# Supplementary material for: Plant-Derived Caffeic Acid and Its Derivatives: An Overview of Their NMR Data and Biosynthetic Pathways
Source: MDPI journal article supplement (doi:10.3390/molecules29071625), 2024-04-04
Supplement: s1 [file s1]

*Supporting Information for:*

## **Caffeic acid and its derivatives: An overview of their NMR data and biosynthetic pathways**

**Jiahui Yu <sup>1,†</sup>, Jingchen Xie <sup>1,†</sup>, Miao Sun <sup>1</sup>, Suhui Xiong <sup>1</sup>, Chunfang Xu <sup>1</sup>, Zhimin Zhang <sup>1</sup>, Minjie Li <sup>1</sup>, Chun Li <sup>2</sup>, Limei Lin <sup>1,\*</sup>**

1 Key Laboratory for Quality Evaluation of Bulk Herbs of Hunan Province, School of Pharmacy, Hunan University of Chinese Medicine, Changsha, 410208, PR China

2 Institute of Chinese Materia Medica, China Academy of Chinese Medical Sciences, Beijing, 100700, PR China

† These authors contributed equally to this paper.

\* Correspondence: limei\_lin@hnu.cm.edu.cn.

## Table of contents

|                                                                          |    |
|--------------------------------------------------------------------------|----|
| Table S1. NMR Spectroscopic Data ( $\delta$ ) of Compounds 1-10.....     | 3  |
| Table S2. NMR Spectroscopic Data ( $\delta$ ) of Compounds 11-17.....    | 5  |
| Table S3. NMR Spectroscopic Data ( $\delta$ ) of Compounds 18-25.....    | 7  |
| Table S4. NMR Spectroscopic Data ( $\delta$ ) of Compounds 26~28.....    | 9  |
| Table S5. NMR Spectroscopic Data ( $\delta$ ) of Compounds 29~37.....    | 11 |
| Table S6. NMR Spectroscopic Data ( $\delta$ ) of Compounds 38~49.....    | 13 |
| Table S7. NMR Spectroscopic Data ( $\delta$ ) of Compounds 50~59.....    | 16 |
| Table S8. NMR Spectroscopic Data ( $\delta$ ) of Compounds 60~71.....    | 19 |
| Table S9. NMR Spectroscopic Data ( $\delta$ ) of Compounds 72~81.....    | 22 |
| Table S10. NMR Spectroscopic Data ( $\delta$ ) of Compounds 82~91.....   | 25 |
| Table S11. NMR Spectroscopic Data ( $\delta$ ) of Compounds 92~102.....  | 28 |
| Table S12. NMR Spectroscopic Data ( $\delta$ ) of Compounds 103~113..... | 31 |
| Table S13. NMR Spectroscopic Data ( $\delta$ ) of Compounds 114~124..... | 34 |
| Table S14. NMR Spectroscopic Data ( $\delta$ ) of Compounds 125~135..... | 37 |
| Table S15. NMR Spectroscopic Data ( $\delta$ ) of Compounds 136~146..... | 41 |
| Table S16. NMR Spectroscopic Data ( $\delta$ ) of Compounds 147~154..... | 44 |
| Table S17. NMR Spectroscopic Data ( $\delta$ ) of Compounds 155~162..... | 47 |
| Table S18. NMR Spectroscopic Data ( $\delta$ ) of Compounds 163~173..... | 50 |

**Table S1.** NMR Spectroscopic Data ( $\delta$ ) of Compounds 1-10

| No.                              | 1          | 2          | 3          | 4          | 5          | 6          | 7                   | 8                   | 9          | 10         |
|----------------------------------|------------|------------|------------|------------|------------|------------|---------------------|---------------------|------------|------------|
| Caffeoyl                         |            |            |            |            |            |            |                     |                     |            |            |
| C <sub>1</sub> /H <sub>1</sub>   | 127.7/-    | 127.7/-    | 127.9/-    | 127.8/-    | 125.5/-    | 127.8/-    | 126.9/-             | 127.5/-             | 127.8/-    | 127.8/-    |
| C <sub>2</sub> /H <sub>2</sub>   | 115.1/7.04 | 115.1/7.03 | 116.6/7.03 | 115.2/7.03 | 114.7/7.02 | 116.2/7.17 | 115.1/7.03          | 115.0/7.20          | 114.6/7.09 | 115.3/7.03 |
| C <sub>3</sub> /H <sub>3</sub>   | 146.8/-    | 146.8/-    | 146.9/-    | 149.8/-    | 148.3/-    | 145.5/-    | 144.6/-             | 145.3/-             | 144.0/-    | 146.8/-    |
| C <sub>4</sub> /H <sub>4</sub>   | 149.4/-    | 149.5/-    | 149.7/-    | 146.9/-    | 145.5/-    | 148.6/-    | 147.1/-             | 148.5/-             | 146.5/-    | 149.6/-    |
| C <sub>5</sub> /H <sub>5</sub>   | 116.5/6.75 | 116.5/6.76 | 123.0/6.77 | 116.5/6.93 | 121.3/6.74 | 115.0/7.04 | 113.8/6.92          | 115.6/6.91          | 115.7/6.87 | 116.5/6.77 |
| C <sub>6</sub> /H <sub>6</sub>   | 122.8/6.93 | 122.9/6.94 | 115.4/6.94 | 122.9/6.77 | 123.0/6.96 | 122.4/6.87 | 121.9/6.80          | 122.3/7.09          | 122.6/7.01 | 123.1/6.91 |
| C <sub>7</sub> /H <sub>7</sub>   | 147.1/7.57 | 146.9/7.52 | 147.0/7.53 | 147.0/7.53 | 144.9/7.40 | 146.2/7.54 | 145.0/7.52          | 146.1/6.32          | 144.9/7.57 | 147.0/7.50 |
| C <sub>8</sub> /H <sub>8</sub>   | 115.5/6.31 | 114.8/6.24 | 115.3/6.24 | 115.4/6.19 | 115.7/6.14 | 115.0/6.29 | 115.0/6.20          | 116.2/7.58          | 116.0/6.27 | 115.3/6.21 |
| C <sub>9</sub> /H <sub>9</sub>   | 171.1/-    | 169.8/-    | 169.5/-    | 171.0/-    | 165.8/-    | 167.4/-    | 167.9/-             | 167.3/-             | 168.0/-    | 169.4/-    |
| C <sub>1'</sub> /H <sub>1'</sub> |            | 52.0/3.75  | 61.5/4.22  | 176.1/-    | 175.2/-    | 64.6/4.14  | 64.6/4.14           | 64.5/4.18           | 65.1/4.19  | 131.0/-    |
| C <sub>2'</sub> /H <sub>2'</sub> |            |            | 14.8/1.30  | 29.8/2.56  | 22.8/1.98  | 32.5/1.68  | 31.8/1.66           |                     | 32.1/1.68  | 117.2/6.71 |
| C <sub>3'</sub> /H <sub>3'</sub> |            |            |            |            |            | 29.92/1.34 |                     |                     | 22-32      | 146.3/-    |
| C <sub>4'</sub> /H <sub>4'</sub> |            |            |            |            |            | 29.89/1.34 | 22.6-29.9/1.22-1.37 | 23.2-32.5/1.32-1.72 | /          | 144.9/-    |
| C <sub>5'</sub> /H <sub>5'</sub> |            |            |            |            |            | 29.5/1.34  |                     |                     | 1.10-1.40  | 116.6/6.70 |

|                         |                                    |                      |                    |                    |                             |                          |                                       |                          |                   |                     |
|-------------------------|------------------------------------|----------------------|--------------------|--------------------|-----------------------------|--------------------------|---------------------------------------|--------------------------|-------------------|---------------------|
|                         | C <sub>6</sub> /H <sub>6</sub> '   |                      |                    |                    |                             | 26.6/1.34                |                                       |                          | 121.4/6.56        |                     |
|                         | C <sub>7</sub> /H <sub>7</sub> '   |                      |                    |                    |                             | 23.2/1.34                |                                       |                          | 35.7/2.80         |                     |
|                         | C <sub>8</sub> /H <sub>8</sub> '   |                      |                    |                    |                             | 14.3/0.89                |                                       |                          | 66.6/4.27         |                     |
|                         | C <sub>9</sub> /H <sub>9</sub> '   |                      |                    |                    |                             |                          |                                       |                          |                   |                     |
|                         | ~                                  |                      |                    |                    |                             |                          |                                       |                          |                   |                     |
|                         | C <sub>17</sub> /H <sub>17</sub> ' |                      |                    |                    |                             |                          |                                       |                          |                   |                     |
|                         | C <sub>18</sub> /H <sub>18</sub> ' |                      |                    |                    |                             |                          | 14.0/0.85                             |                          |                   |                     |
|                         | C <sub>19</sub> /H <sub>19</sub> ' |                      |                    |                    |                             |                          |                                       |                          |                   |                     |
|                         | C <sub>20</sub> /H <sub>20</sub> ' |                      |                    |                    |                             |                          |                                       | 14.2/0.92                |                   |                     |
|                         | C <sub>21</sub> /H <sub>21</sub> ' |                      |                    |                    |                             |                          |                                       |                          |                   |                     |
|                         | C <sub>22</sub> /H <sub>22</sub> ' |                      |                    |                    |                             |                          |                                       |                          | 14.3/0.88         |                     |
| Determination condition | 100MHz,                            |                      | 100MHz,            | 125MHz,            |                             | 75MHz                    | 100MHz,                               |                          | 100MHz,           | 150MHz,             |
|                         | CD <sub>3</sub> OD                 | 125MHz,              | CD <sub>3</sub> OD | CD <sub>3</sub> OD | 150MHz,                     | acetone-d <sub>6</sub> , | CDCl <sub>3</sub> -CD <sub>3</sub> OD | acetone-d <sub>6</sub> , | CDCl <sub>3</sub> | MeOH-d <sub>4</sub> |
|                         |                                    | CD <sub>3</sub> OD / |                    |                    | DMSO-d <sub>6</sub>         |                          |                                       |                          |                   |                     |
|                         | /                                  |                      | /                  | /                  | /                           | /                        | /                                     | /                        | /                 | /                   |
|                         |                                    | 500MHz,              |                    |                    |                             |                          |                                       |                          |                   |                     |
|                         | 400MHz,                            |                      | 400MHz,            | 500MHz,            |                             | 300MHz                   | 400MHz,                               | acetone-d <sub>6</sub>   | 400MHz,           | 600MHz,             |
|                         |                                    | CD <sub>3</sub> OD   |                    |                    | 600MHz, DMSO-d <sub>6</sub> |                          |                                       |                          |                   |                     |
|                         | CD <sub>3</sub> OD                 |                      | CD <sub>3</sub> OD | CD <sub>3</sub> OD |                             | acetone-d <sub>6</sub>   | CDCl <sub>3</sub> -CD <sub>3</sub> OD |                          | CDCl <sub>3</sub> | MeOH-d <sub>4</sub> |
| Reference               | [12]                               | [13]                 | [14]               | [15]               | [16]                        | [17]                     | [18]                                  | [19]                     | [20]              | [21]                |

**Table S2.** NMR Spectroscopic Data ( $\delta$ ) of Compounds 11-17

| No.                                | 11               | 12               | 13                      | 14                      | 15                      | 16                      | 17          |
|------------------------------------|------------------|------------------|-------------------------|-------------------------|-------------------------|-------------------------|-------------|
| Caffeoyl                           |                  |                  |                         |                         |                         |                         |             |
| C <sub>1</sub> /H <sub>1</sub>     | 128.04/-         | 125.23/-         | 126.19,126.19/-         | 128.69,127.56/          | 127.76,128.31/-         | 127.67,128.57/-         | 127.64/-    |
| C <sub>2</sub> /H <sub>2</sub>     | 117.43/7.10      | 115.25/7.14-7.05 | 113.65,113.42/7.19,7.09 | 113.90,112.42/7.16,7.13 | 116.44,131.90/7.07,7.49 | 116.05,114.08/7.12,7.05 | 114.11/7.09 |
| C <sub>3</sub> /H <sub>3</sub>     | 145.49/-         | 148.87/-         | 146.12,147.13/-         | 151.73,148.00/          | 145.43,117.11/-         | 147.75,148.87/-         | 148.93/-    |
| C <sub>4</sub> /H <sub>4</sub>     | 148.64/-         | 145.61/-         | 146.47,149.45/-         | 149.90,148.27/          | 148.10,148.32/-         | 150.79,145.44/-         | 145.45/-    |
| C <sub>5</sub> /H <sub>5</sub>     | 114.26/6.87      | 115.81/6.79      | 115.30,110.63/7.02,6.83 | 116.48,115.06/7.02,7.00 | 115.07,117.11/6.77,6.81 | 117.45,133.61/6.77      | 133.61/-    |
| C <sub>6</sub> /H <sub>6</sub>     | 116.49/7.03,7.05 | 121.74/7.14-7.05 | 122.71,122.06/7.10,6.82 | 123.37,123.17/6.83,6.83 | 117.21,131.90/6.9,7.49  | 124.27,123.70/7.01,7.02 | 123.76/7.01 |
| C <sub>7</sub> /H <sub>7</sub>     | 148.90/7.62      | 147.05/7.56      | 143.33,143.33/7.65,7.59 | 147.87,146.84/7.72,7.69 | 147.91,147.91/7.60,7.70 | 149.29,149.20/7.55,7.53 | 149.47/7.54 |
| C <sub>8</sub> /H <sub>8</sub>     | 124.33/6.33      | 112.36/6.37      | 114.87,114.92/6.40,6.35 | 114.96,114.70/6.48,6.43 | 115.33,124.12/6.41,6.45 | 114.85,114.90/6.36,6.33 | 114.70/6.34 |
| C <sub>9</sub> /H <sub>9</sub>     | 169.40/-         | 165.53/-         | 167.64,167.64/-         | 167.89,167.71/          | 169.83/-                | 168.71,168.75/-         | 168.62/-    |
| C <sub>1'</sub> /H <sub>1'</sub>   | 172.46/-         | 167.48/-         | 172.25/-                | 170.60/                 | 173.15/-                | 171.15/-                | 170.75/-    |
| C <sub>2'</sub> /H <sub>2'</sub>   | 71.54/5.60       | 70.69/5.69       | 73.34/5.49              | 73.12/5.83              | 72.83/5.71              | 73.87/5.70              | 73.56/5.66  |
| C <sub>3'</sub> /H <sub>3'</sub>   | 75.25/4.91       | 70.69/5.69       | 73.34/5.49              | 73.12/5.83              | 72.83/5.71              | 73.87/5.70              | 73.56/-     |
| C <sub>4'</sub> /H <sub>4'</sub>   | 175.08/-         | 167.48/-         | 172.25/-                | 170.60/                 | 173.15/-                | 171.15/-                | 170.75/-    |
| C <sub>1''</sub> /H <sub>1''</sub> |                  |                  | 55.83/3.78              | 56.33/3.93              |                         | 128.55/-                | 128.66/-    |

|                                     |                           |                             |                  |                    |                                              |                            |                            |
|-------------------------------------|---------------------------|-----------------------------|------------------|--------------------|----------------------------------------------|----------------------------|----------------------------|
| C <sub>2</sub> ''/H <sub>2</sub> '' |                           |                             |                  |                    |                                              | 118.11/6.57                | 118.12/6.58                |
| C <sub>3</sub> ''/H <sub>3</sub> '' |                           |                             |                  |                    |                                              | 147.57/-                   | 147.56/-                   |
| C <sub>4</sub> ''/H <sub>4</sub> '' |                           |                             |                  |                    |                                              | 146.78/-                   | 146.78/-                   |
| C <sub>5</sub> ''/H <sub>5</sub> '' |                           |                             |                  |                    |                                              | 117.03/6.56                | 117.05/6.52                |
| C <sub>6</sub> ''/H <sub>6</sub> '' |                           |                             |                  |                    |                                              | 122.30/6.42                | 122.31/6.42                |
| C <sub>7</sub> ''/H <sub>7</sub> '' |                           |                             |                  |                    |                                              | 39.74/3.07,2.79            | 39.75/3.08,2.79            |
| C <sub>8</sub> ''/H <sub>8</sub> '' |                           |                             |                  |                    |                                              | 49.12/4.11                 | 49.20/4.11                 |
| C <sub>9</sub> ''/H <sub>9</sub> '' |                           |                             |                  |                    |                                              | 178.55/-                   | 178.55/-                   |
|                                     | 75.5MHz, D <sub>2</sub> O | 500MHz, DMSO-d <sub>6</sub> | D <sub>2</sub> O | CD <sub>3</sub> OD | 75.5MHz, D <sub>2</sub> O                    | DMSO-d <sub>6</sub>        | DMSO-d <sub>6</sub>        |
| Determination condition             | /                         | /                           | /                | /                  | /                                            | /                          | /                          |
|                                     | 300MHz, D <sub>2</sub> O  | 125MHz, DMSO-d <sub>6</sub> | D <sub>2</sub> O | CD <sub>3</sub> OD | 300MHz, D <sub>2</sub> O, CD <sub>3</sub> OD | 400MHz, CD <sub>3</sub> OD | 400MHz, CD <sub>3</sub> OD |
| Reference                           | [22]                      | [23]                        | [24]             | [24]               | [22]                                         | [25]                       | [25]                       |

**Table S3.** NMR Spectroscopic Data ( $\delta$ ) of Compounds 18-25

| No.                                     | 18              | 19             | 20             | 21         | 22         | 23         | 24         | 25         |
|-----------------------------------------|-----------------|----------------|----------------|------------|------------|------------|------------|------------|
| caffeoyl C <sub>1</sub> /H <sub>1</sub> | 129.7/-         | 126.5/-        | 126.4/-        | 126.5/-    | 126.5/-    | 128.3/-    | 128.2/-    | 128.5/-    |
| C <sub>2</sub> /H <sub>2</sub>          | 121.2/6.69      | 114.1/6.95     | 114.1/6.95     | 114.1/6.94 | 114.1/6.94 | 117.8/7.08 | 115.2/7.02 | 115.0/7.02 |
| C <sub>3</sub> /H <sub>3</sub>          | 145.0/-         | 145.7/-        | 145.7/-        | 145.7/-    | 145.7/-    | 145.8/-    | 146.7/-    | 146.6/-    |
| C <sub>4</sub> /H <sub>4</sub>          | 146.0/-         | 147.7/-        | 147.6/-        | 147.6/-    | 147.6/-    | 147.4/-    | 148.9/-    | 148.6/-    |
| C <sub>5</sub> /H <sub>5</sub>          | 117.4/6.67      | 116.0/6.75     | 115.9/6.75     | 116.0/6.74 | 115.9/6.74 | 116.0/6.71 | 116.5/6.78 | 116.5/6.77 |
| C <sub>6</sub> /H <sub>6</sub>          | 121.7/6.56      | 120.8/6.85     | 120.6/6.85     | 120.6/6.82 | 120.7/6.82 | 123.4/6.85 | 122.2/6.91 | 122.2/6.89 |
| C <sub>7</sub> /H <sub>7</sub>          | 142.3/6.65      | 140.1/7.25     | 140.0/7.25     | 139.7/7.19 | 139.8/7.20 | 139.5/6.59 | 143.0/7.40 | 141.9/7.34 |
| C <sub>8</sub> /H <sub>8</sub>          | 116.4/7.49      | 118.2/6.44     | 118.1/6.41     | 118.4/6.42 | 118.2/6.41 | 120.6/5.80 | 117.7/6.43 | 118.9/6.41 |
| C <sub>9</sub> /H <sub>9</sub>          | 168.3/-         | 165.4/-        | 165.6/-        | 165.4/-    | 165.5/-    | 169.8/-    | 169.0/-    | 168.3/-    |
| C <sub>1'</sub> /H <sub>1'</sub>        | 135.1/-         | 172.8/-        | 173.5/-        | 128.7/-    | 127.9/-    | 129.3/-    | 129.5/-    | 131.0/-    |
| C <sub>2'</sub> /H <sub>2'</sub>        | 128.7/7.53      | 48.9/4.63      | 51.4/4.33      | 116.7/6.62 | 130.2/7.03 | 117.1/6.64 | 113.8/6.80 | 117.7/6.72 |
| C <sub>3'</sub> /H <sub>3'</sub>        | 129.7/7.33-7.38 | 36.7/2.62,2.73 | 26.7/1.82,2.01 | 145.1/-    | 115.2/6.65 | 146.2/-    | 148.9/-    | 145.8/-    |
| C <sub>4'</sub> /H <sub>4'</sub>        | 130.7/7.33-7.38 | 172.0/-        | 30.2/2.30      | 144.0/-    | 156.1/-    | 145.2/-    | 146.5/-    | 144.8/-    |
| C <sub>5'</sub> /H <sub>5'</sub>        | 129.7/7.33-7.38 |                | 173.2/-        | 115.5/6.60 | 115.2/6.65 | 116.3/6.68 | 116.2/6.73 | 116.1/6.67 |
| C <sub>6'</sub> /H <sub>6'</sub>        | 128.7/7.53      |                |                | 120.0/6.47 | 130.2/7.03 | 121.6/6.46 | 122.8/6.66 | 122.1/6.58 |

|                                  |                                |                              |                              |                              |                              |                    |                    |                    |
|----------------------------------|--------------------------------|------------------------------|------------------------------|------------------------------|------------------------------|--------------------|--------------------|--------------------|
| C <sub>7</sub> /H <sub>7</sub>   | 37.8/2.91,3.10                 |                              |                              | 35.0/2.72,2.91               | 36.4/2.78,2.98               | 37.8/2.87,2.96     | 38.2/2.97,3.12     | 38.7/2.94,3.12     |
| C <sub>8</sub> /H <sub>8</sub>   | 55.5/4.72                      |                              |                              | 54.3/4.42                    | 54.2/4.48                    | 55.4/4.69          | 55.7/4.76          | 57.5/4.61          |
| C <sub>9</sub> /H <sub>9</sub>   | 175.0/-                        |                              |                              | 173.7/-                      | 173.5/-                      | 173.6/-            | 173.8/-            | 178.2/-            |
| C <sub>10</sub> /H <sub>10</sub> |                                |                              |                              |                              |                              | 52.6/3.69          | 56.4/3.83          |                    |
| C <sub>11</sub> /H <sub>11</sub> |                                |                              |                              |                              |                              |                    | 52.7/3.72          |                    |
|                                  | 100.5 MHz, MeOH-d <sub>4</sub> | 100 MHz, DMSO-d <sub>6</sub> | CD <sub>3</sub> OD | CD <sub>3</sub> OD | CD <sub>3</sub> OD |
| Determination condition          | /                              | /                            | /                            | /                            | /                            | /                  | /                  | /                  |
|                                  | 400 MHz, MeOH-d <sub>4</sub>   | 400 MHz, DMSO-d <sub>6</sub> | CD <sub>3</sub> OD | CD <sub>3</sub> OD | CD <sub>3</sub> OD |
| Reference                        | [26]                           | [27]                         | [27]                         | [27]                         | [27]                         | [28]               | [28]               | [28]               |



**Table S4.** NMR Spectroscopic Data ( $\delta$ ) of Compounds 26~28

| No.                                       | 26              | 27              | 28              |
|-------------------------------------------|-----------------|-----------------|-----------------|
| Shikimic C <sub>1</sub> /H <sub>1</sub>   | 128.5/-         | 131.0/-         | 132.8/-         |
| C <sub>2</sub> /H <sub>2</sub>            | 138.6/6.70      | 138.2/6.84      | 132.7/6.48      |
| C <sub>3</sub> /H <sub>3</sub>            | 65.5/4.30       | 65.6/4.61       | 70.9/5.53       |
| C <sub>4</sub> /H <sub>4</sub>            | 68.3/3.78       | 75.0/5.02       | 69.9/3.79       |
| C <sub>5</sub> /H <sub>5</sub>            | 70.5/4.48       | 65.8/4.20       | 68.3/3.87       |
| C <sub>6</sub> /H <sub>6</sub>            | 27.5/2.67, 2.19 | 32.1/2.30, 2.72 | 31.9/2.52, 2.12 |
| C <sub>7</sub> /H <sub>7</sub>            | 168.0/-         | 169.8/-         | 169.7/-         |
| Caffeoyl C <sub>1'</sub> /H <sub>1'</sub> | 125.9/-         | 127.8/-         | 126.8/-         |
| C <sub>2'</sub> /H <sub>2'</sub>          | 114.7/7.00      | 115.1/7.04      | 116.2/7.06      |
| C <sub>3'</sub> /H <sub>3'</sub>          | 145.2/-         | 147.2/-         | 147.1/-         |
| C <sub>4'</sub> /H <sub>4'</sub>          | 149.7/-         | 146.7/-         | 150.1/-         |
| C <sub>5'</sub> /H <sub>5'</sub>          | 116.4/6.26      | 116.5/6.77      | 117.3/6.78      |
| C <sub>6'</sub> /H <sub>6'</sub>          | 121.6/6.78      | 123.0/6.95      | 122.6/7.00      |
| C <sub>7'</sub> /H <sub>7'</sub>          | 149.5/7.06      | 147.2/7.59      | 146.6/7.52      |
| C <sub>8'</sub> /H <sub>8'</sub>          | 114.9/5.12      | 115.2/6.33      | 115.7/6.28      |

|                                |                                 |                            |                             |
|--------------------------------|---------------------------------|----------------------------|-----------------------------|
| C <sub>9</sub> /H <sub>9</sub> | 166.7/-                         | 168.9/-                    | 167.2/-                     |
|                                | 125.77 MHz, DMSO-d <sub>6</sub> | 75MHz, CD <sub>3</sub> OD  | 125MHz, CD <sub>3</sub> OD  |
| Determination condition        | /                               | /                          | /                           |
|                                | 500.13 MHz, DMSO-d <sub>6</sub> | 300MHz, CD <sub>3</sub> OD | 500MHz, DMSO-d <sub>6</sub> |
| Reference                      | [29]                            | [30]                       | [31]                        |

---

**Table S5.** NMR Spectroscopic Data ( $\delta$ ) of Compounds 29~37

| No.                                        | 29              | 30             | 31          | 32             | 33              | 34             | 35           | 36             | 37             |
|--------------------------------------------|-----------------|----------------|-------------|----------------|-----------------|----------------|--------------|----------------|----------------|
| Quinic acid C <sub>1</sub> /H <sub>1</sub> | 75.4/-          | 75.8/-         | 75.91/-     | 76.2/-         | 76.6/-          | 75.0/-         | 75.5/-       | 73.9/-         | 81.6/-         |
| C <sub>2</sub> /H <sub>2</sub>             | 36.7/2.20,2.13  | 38.0/1.99,2.19 | 38.70/2.12  | 37.5/2.20      | 38.4/ 2.06,2.17 | 40.7/2.01-2.28 | 41.5/1.9-2.2 | 39.4/2.00-2.24 | 35.9/3.52,2.57 |
| C <sub>3</sub> /H <sub>3</sub>             | 73.0/5.34       | 70.3/4.13      | 73.21/5.36  | 71.8/5.30      | 69.6/4.28       | 64.3/4.29      | 68.5/4.140   | 67.2/4.13      | 67.9/4.17      |
| C <sub>4</sub> /H <sub>4</sub>             | 74.8/ 3.63      | 72.5/3.72      | 70.91/3.76  | 72.3/3.77      | 79.3/4.79       | 77.1/4.84      | 74.8/3.643   | 72.4/3.70      | 76.2/4.09      |
| C <sub>5</sub> /H <sub>5</sub>             | 68.3/4.14       | 72.1/5.26      | 71.49/4.19  | 70.1/4.17      | 65.5/4.27       | 67.6/4.29      | 73.1/5.353   | 71.2/5.38      | 69.5/2.45      |
| C <sub>6</sub> /H <sub>6</sub>             | 41.5/1.95, 2.13 | 37.7/2.18,2.18 | 37.92/2.12  | 37.8/2.02,2.25 | 42.7/2.00,2.20  | 37.0/2.01-2.28 | 36.8/-       | 34.9/2.00-2.24 | 39.6/2.20,1.96 |
| C <sub>7</sub> /H <sub>7</sub>             | 178.3/-         | 175.4/-        | 173.99/-    | 175.5/-        | 177.3/-         | 174.3/-        | 178.6/-      | 175.0/-        | 175.4/-        |
| C <sub>8</sub> /H <sub>8</sub>             |                 | 53.0/3.68      | 61.76/4.15  | 66.3/4.11      |                 | 51.5/3.77      |              | 51.4/3.75      |                |
| C <sub>9</sub> /H <sub>9</sub>             |                 |                | 14.34/1.23  | 31.8/1.64      |                 |                |              |                |                |
| C <sub>10</sub> /H <sub>10</sub>           |                 |                |             | 20.1/1.38      |                 |                |              |                |                |
| C <sub>11</sub> /H <sub>11</sub>           |                 |                |             | 14.2/0.92      |                 |                |              |                |                |
| Caffeoyl C <sub>1</sub> /H <sub>1'</sub>   | 127.9/-         | 127.6/-        | 127.57/-    | 127.9/-        | 127.8/-         | 126.5/-        | 122.9/6.940  | 126.5/-        | 127.8/-        |
| C <sub>2</sub> /H <sub>2'</sub>            | 115.1/7.04      | 115.1/7.03     | 116.39/7.17 | 115.0/7.06     | 115.1/7.06      | 113.7/7.08     | 115.9/6.305  | 115.0/7.06     | 115.1/7.05     |
| C <sub>3</sub> /H <sub>3'</sub>            | 146.79/-        | 146.8/-        | 115.73/-    | 150.1/-        | 146.8/-         | 145.4/-        | 146.9/7.583  | 145.4/-        | 146.8/-        |
| C <sub>4</sub> /H <sub>4'</sub>            | 149.4/-         | 149.7/-        | 148.78/-    | 147.3/-        | 149.6/-         | 148.2/-        | 128.1/-      | 148.1/-        | 149.6/-        |

|                                             |                    |                    |                        |                    |                    |                    |                    |                    |                     |
|---------------------------------------------|--------------------|--------------------|------------------------|--------------------|--------------------|--------------------|--------------------|--------------------|---------------------|
| C <sub>5</sub> /H <sub>5</sub> <sup>c</sup> | 116.4/6.76         | 116.5/6.77         | 146.29/7.04            | 116.2/6.81         | 116.5/6.77         | 115.1/6.80         | 115.2/7.041        | 114.3/6.89         | 116.5/6.79          |
| C <sub>6</sub> /H <sub>6</sub> <sup>c</sup> | 122.9/ 6.93        | 123.0/6.94         | 115.13/6.88            | 122.7/6.98         | 123.0/ 6.96        | 121.5/6.99         | 145.0/-            | 121.5/6.97         | 123.0/6.96          |
| C <sub>7</sub> /H <sub>7</sub> <sup>c</sup> | 146.80/7.58        | 147.2/7.51         | 145.85/7.55            | 147.0/7.55         | 147.1/7.65         | 145.7/7.66         | 149.8/-            | 145.4/7.61         | 147.3/7.56          |
| C <sub>8</sub> /H <sub>8</sub> <sup>c</sup> | 115.8/6.30         | 115.0/6.21         | 122.54/6.26,6.21       | 114.8/6.24         | 115.4/6.37         | 113.9/6.38         | 116.5/6.770        | 113.7/6.33         | 115.3/6.28          |
| C <sub>9</sub> /H <sub>9</sub> <sup>c</sup> | 169.0/-            | 168.3/-            | 167.98/-               | 168.7/-            | 169.0/-            | 167.5/-            | 169.1/-            | 167.5/-            | 168.1/-             |
| Determination condition                     | 125MHz,            | 100MHz,            | 50.7MHz,               | 150MHz,            | 125MHz,            | 125MHz,            | 125.8MHz,          | 125MHz,            | 75.4MHz,            |
|                                             | CD <sub>3</sub> OD | CD <sub>3</sub> OD | acetone-D <sub>6</sub> | CD <sub>3</sub> OD | MeOH-D <sub>4</sub> |
|                                             | /                  | /                  | /                      | /                  | /                  | /                  | /                  | /                  | /                   |
|                                             | 500MHz,            | 400MHz,            | 200MHz,                | 600MHz,            | 500MHz,            | 500MHz,            | 500.2MHz,          | 500MHz,            | 300.1MHz,           |
|                                             | CD <sub>3</sub> OD | CD <sub>3</sub> OD | acetone-D <sub>6</sub> | CD <sub>3</sub> OD | MeOH-D <sub>4</sub> |
| Reference                                   | [32]               | [33]               | [34]                   | [35]               | [32]               | [36]               | [37]               | [36]               | [38]                |

**Table S6.** NMR Spectroscopic Data ( $\delta$ ) of Compounds 38~49

| No.                            | 38             | 39                 | 40             | 41            | 42                 | 43            | 44                  | 45                 | 46                 | 47                 | 48               | 49                  |
|--------------------------------|----------------|--------------------|----------------|---------------|--------------------|---------------|---------------------|--------------------|--------------------|--------------------|------------------|---------------------|
| Quinic                         |                |                    |                |               |                    |               |                     |                    |                    |                    |                  |                     |
| acid                           | 74.8/-         | 74.6/-             | 74.27/-        | 76.1/-        | 75.8/-             | 76.6/-        | 76.33/-             | 82.7/-             | 76.8/-             | 80.0/-             | 79.5/-           | 72.7/-              |
| C <sub>1</sub> /H <sub>1</sub> |                |                    |                |               |                    |               |                     |                    |                    |                    |                  |                     |
| C <sub>2</sub> /H <sub>2</sub> | 37.7/2.1-2.3   | 36.7/2.31,2.1<br>9 | 36.95/2.26     | 39.4/2.0-2.4  | 38.6/2.26,2.2<br>6 | 42.0/2.0-2.4  | 42.12/2.15          | 35.5/2.25,<br>2.69 | 40.2/2.15<br>,1.87 | 34.2/2.49<br>,2.16 | 34.3/2.88,2.45   | 35.5/2.30,2.00      |
| C <sub>3</sub> /H <sub>3</sub> | 72.2/5.400     | 72.0/5.31          | 71.59/5.40     | 69.0/5.625    | 68.6/5.56          | 65.9/4.373    | 66.80/4.32          | 70.5/5.45          | 68.4/5.55          | 69.0/4.00          | 71.0/5.37        | 68.5/5.46           |
| C <sub>4</sub> /H <sub>4</sub> | 70.8/3.981     | 69.7/3.98          | 69.67/4.05     | 75.8/5.121    | 74.9/5.12          | 75.3/4.993    | 70.63/5.04          | 73.2/3.72          | 76.1/4.98          | 72.5/3.50          | 70.7/3.99        | 68.6/5.21           |
| C <sub>5</sub> /H <sub>5</sub> | 72.6/5.437     | 72.2/5.40          | 71.83/5.40     | 69.4/4.372    | 69.1/4.36          | 70.2/5.635    | 75.94/5.62          | 69.6/4.22          | 69.1/4.24          | 70.6/5.24          | 70.2/5.44        | 67.8/5.46           |
| C <sub>6</sub> /H <sub>6</sub> | 36.1/2.1-2.3   | 35.7/2.34,2.1<br>5 | 35.64/2.26     | 38.4/2.0-2.4  | 38.4/2.32,2.1<br>0 | 37.1/2.0-2.4  | 37.57/2.35,2.1<br>2 | 37.1/1.98,<br>2.69 | 38.3/2.15          | 37.9/2.33<br>,1.78 | 35.3/2.55,2.10   | 35.5/2.21,2.07      |
| C <sub>7</sub> /H <sub>7</sub> | 177.4/-        | 175.6/-            | 174.43/-       | 176. 8/-      | 175.2/-            | 178.0/-       | 176.91/-            | 176.8/-            | 177.6/-            | 176.9/-            | 173.5/-          | 175.3/-             |
| C <sub>8</sub> /H <sub>8</sub> |                | 53.0/3.70          | 61.72/4.13     |               | 53.1/3.72          |               | 37.57/3.76          |                    |                    |                    |                  |                     |
| C <sub>9</sub> /H <sub>9</sub> |                |                    | 14.30/1.22     |               |                    |               |                     |                    |                    |                    |                  |                     |
| Caffeoyl                       |                |                    | 127.70,127.63/ |               |                    |               | 128.52,128.46/      | 126.8,126.         | 125.8,             | 124.8,             | 126.4,126.3/7.07 |                     |
| C <sub>1</sub> /H <sub>1</sub> | 128.0,127.9 /- | 127.9,127.6/-      | -              | 127.8,127.7/- | 127.7,127.5/-      | 127.9,127.8/- | -                   | 5/-                | 126.1/-            | 125.4/-            | ,6.96,6.84       | 125.3,125.4,125.5/- |

|                                |                |               |                     |                |               |                     |                |            |           |           |                  |                      |
|--------------------------------|----------------|---------------|---------------------|----------------|---------------|---------------------|----------------|------------|-----------|-----------|------------------|----------------------|
| C <sub>2</sub> /H <sub>2</sub> | 115.4,115.3/7. | 115.2,114.9/7 | 116.43,116.37/      | 115.3,115.2    | 115.2,115.2/7 | 115.3,115.2/7.      | 115.95/7.03,7. | 113.7,113. | 115.4,    | 114.3,    |                  | 114.9,114.9,114.9/7. |
|                                | 067,7.067      | .07,7.06      | 7.18,7.16           | /7.024,7.005   | .04,7.02      | 038,7.016           | 02             | 6/7.05     | 115.4/7.0 | 114.3/7.0 | 113.7,113.6/-    | 04,7.03,7.01         |
|                                |                |               |                     |                |               |                     |                |            | 2,7.02    | 6,7.00    |                  |                      |
| C <sub>3</sub> /H <sub>3</sub> | 147.3,147.1/-  | 146.9,146.8/- | 116.14,115.52/<br>- | 146.8,146.8/-  | 146.8,146.8/- | 147.43,147.37/<br>- | 147.55/-       | 145.3,144. | 146.2,146 | 145.8,145 | 145.6,145.4/-    | 145.6,145.6,145.6/-  |
|                                |                |               |                     |                |               |                     |                | 8/-        | .2/-      | .8/-      |                  |                      |
|                                |                |               |                     |                |               |                     |                |            |           |           |                  |                      |
| C <sub>4</sub> /H <sub>4</sub> | 149.6,149.5/-  | 149.7,149.5/- | 148.89,148.70/<br>- | 149.7,149.7/-  | 149.8,149.7/- | 149.7,149.7/-       | 150.38/-       | 148.2,147. | 149.2,149 | 149.3,148 | 146.2,146.0/-    | 148.4,148.5,148.6/-  |
|                                |                |               |                     |                |               |                     |                | 8/-        | .2/-      | .4/-      |                  |                      |
|                                |                |               |                     |                |               |                     |                |            |           |           |                  |                      |
| C <sub>5</sub> /H <sub>5</sub> | 116.6,116.6/6. | 116.6,116.5/6 | 146.32,146.28/      | 116.5,116.5/6. | 116.5,116.5/6 | 116.6,116.5/6.      | 117.26/6.76,6. | 115.1,115. | 116.4,    | 115.6,    | 115.2,115.1/6.75 | 115.7,115.8,115.8/6. |
|                                | 790,6.788      | .79,6.78      | 7.05,6.94           | 750,6.745      | .76,6.76      | 869                 | 73             | 0/6.77     | 116.4/6.7 | 115.6/6.7 | ,6.65,6.54       | 74,6.76,6.70         |
|                                |                |               |                     |                |               |                     |                |            | 5,6.75    | 0,6.73    |                  |                      |
| C <sub>6</sub> /H <sub>6</sub> | 123.1,123.0/6. | 123.1,123.0/6 | 115.44,115.12/      | 123.2,123.2/6. | 123.1,123.1/6 | 123.3,123.1/6.      | 124.03,123.90/ | 121.6,121. | 122.0,    | 121.1,    | 121.8,121.7/6.97 | 121.4,121.5,121.6/6. |
|                                | 979,6.963      | .97,6.97      | 6.88,6.83           | 905            | .93,6.91      | 924                 | 6.91,6.88      | 4/6.94     | 122.0/6.9 | 120.4/6.9 | ,6.83,6.64       | 97,6.99,6.92         |
|                                |                |               |                     |                |               |                     |                |            | 5,6.95    | 4,6.90    |                  |                      |
| C <sub>7</sub> /H <sub>7</sub> | 146.8,146.8/7. | 147.4,147.1/7 | 122.61,122.48/      | 147.8,147.6/7. | 147.7,147.7/7 | 146.9,146.8/7.      | 148.19/7.56,7. | 145.5,145. | 146.1,    | 144.8,    | 148.3/7.64,7.56, | 146.0,145.7,145.5/7. |
|                                | 621,7.579      | .62,7.55      | 7.59,7.56           | 600,7.518      | .61,7.51      | 574,7.543           | 54             | 4/7.57     | 146.1/7.5 | 143.2/7.4 | 7.51             | 45,7.49,7.42         |
|                                |                |               |                     |                |               |                     |                |            | 0,7.50    | 6,7.34    |                  |                      |

|                                             |                    |                    |                        |                    |                    |                    |                         |                    |                   |                   |                         |                      |
|---------------------------------------------|--------------------|--------------------|------------------------|--------------------|--------------------|--------------------|-------------------------|--------------------|-------------------|-------------------|-------------------------|----------------------|
|                                             |                    |                    |                        |                    |                    |                    |                         |                    | 114.2,            | 113.6,            |                         |                      |
| C <sub>8</sub> /H <sub>8</sub> <sup>s</sup> | 115.7,115.2/6.     | 115.5,115.2/6      | 146.11,145.66/         | 114.81,114.76      | 114.7,114.6/6      | 115.1,115.0/6.     | 115.80,115.60/          | 115.5,114.         | 114.2/6.2         | 116.1/6.7         | 114.3,114.2/6.34        | 114.1,113.5,113.2/6. |
|                                             | 346,6.265          | .34,6.22           | 6.31                   | /6.286,6.192       | .30,6.18           | 252,6.284          | 6.26                    | 2/6.32             | 4,6.24            | 3, 6.12           | ,6.30,6,25              | 17,6.19,6.23         |
|                                             |                    |                    |                        |                    |                    |                    |                         |                    |                   |                   |                         |                      |
| C <sub>9</sub> /H <sub>9</sub> <sup>s</sup> | 168.9,168.4/-      | 168.7,168.0/-      | 167.00,166.58/<br>-    | 168.6,168.3 /-     | 168.5,167.9/-      | 168.7,168.6/-      | 169.32,169.23/<br>-     | 167.8,166.<br>9/-  | 166.6,166<br>.8/- | 166.2,165<br>.6/- | 167.3,167.2,166.<br>5/- | 166.0,165.7,165.5/-  |
|                                             |                    |                    |                        |                    |                    |                    |                         |                    | 100MHz            | 75MHz,            |                         |                      |
| Determi                                     | 125.8MHz,          | 125MHz,            | 50.7MHz,               | 125.8MHz,          | 125MHz,            | 125.8MHz,          |                         | 125MHz,            | , DMSO-           | DMSO-             | 125MHz,                 | 125MHz,              |
| nation                                      | CD <sub>3</sub> OD | CD <sub>3</sub> OD | acetone-D <sub>6</sub> | CD <sub>3</sub> OD | CD <sub>3</sub> OD | CD <sub>3</sub> OD | methanol-d <sub>4</sub> | CD <sub>3</sub> OD | d <sub>6</sub>    | d <sub>6</sub>    | CD <sub>3</sub> OD      | DMSO-d <sub>6</sub>  |
| conditio                                    | /                  | /                  | /                      | /                  | /                  | /                  | /                       | /                  | /                 | /                 | /                       | /                    |
| n                                           | 500.2MHz,          | 500MHz,            | 200MHz,                | 500.2MHz,          | 500MHz,            | 500.2MHz,          | methanol-d <sub>4</sub> | 500MHz,            | 400MHz            | 300MHz            | 500MHz,                 | 500MHz,              |
|                                             | CD <sub>3</sub> OD | CD <sub>3</sub> OD | acetone-D <sub>6</sub> | CD <sub>3</sub> OD | CD <sub>3</sub> OD | CD <sub>3</sub> OD |                         | CD <sub>3</sub> OD | ,<br>DMSO-        | , DMSO-           | CD <sub>3</sub> OD      | DMSO-d <sub>6</sub>  |
|                                             |                    |                    |                        |                    |                    |                    |                         |                    | DMSO-             | d <sub>6</sub>    |                         |                      |
| Referenc                                    | [37]               | [39]               | [34]                   | [37]               | [39]               | [37]               | [40]                    | [41]               | [42]              | [43]              | [44]                    | [45]                 |
| e                                           |                    |                    |                        |                    |                    |                    |                         |                    |                   |                   |                         |                      |

**Table S7.** NMR Spectroscopic Data ( $\delta$ ) of Compounds 50~59

| No.                              | 50                  | 51                           | 52                           | 53             | 54             | 55             | 56             | 57             | 58                 | 59             |
|----------------------------------|---------------------|------------------------------|------------------------------|----------------|----------------|----------------|----------------|----------------|--------------------|----------------|
| Quinic acid                      |                     |                              |                              |                |                |                |                |                |                    |                |
| C <sub>1</sub> /H <sub>1</sub>   | 80.0/-              | 79.5/-                       | 79.3/-                       | 74.0/-         | 73.1/-         | 72.4/-         | 72.7/-         | 72.5/-         | 74.7/-             | 76.2/-         |
| C <sub>2</sub> /H <sub>2</sub>   | 32.3/2.39-2.55      | 34.7/2.32-2.60               | 32.6/2.52-2.72,2.52-<br>2.72 | 37.8/1.97,2.20 | 40.0/2.14,1.99 | 36.4/2.19,2.00 | 35.5/2.10,2.04 | 35.5/2.25,1.97 | 35.7/2.10-<br>2.34 | 38.8/2.03,2.24 |
| C <sub>3</sub> /H <sub>3</sub>   | 70.3/5.25           | 65.6/4.24                    | 69.0/5.62                    | 66.7/4.30      | 68.9/5.53      | 71.2/5.31      | 70.8/5.29      | 67.8/5.43      | 72.1/5.38          | 69.1/4.29      |
| C <sub>4</sub> /H <sub>4</sub>   | 71.9/3.84           | 74.4/4.92                    | 72.2/5.24                    | 75.2/4.97      | 73.1/4.92      | 68.3/3.84      | 67.5/3.84      | 72.1/5.02      | 69.8/3.95          | 75.4/5.06      |
| C <sub>5</sub> /H <sub>5</sub>   | 69.6/5.22           | 67.2/5.46                    | 67.6/5.60                    | 67.4/5.57      | 65.3/4.16      | 70.0/5.28      | 70.6/5.19      | 64.8/4.05      | 72.2/5.29          | 69.5/5.48      |
| C <sub>6</sub> /H <sub>6</sub>   | 36.6/1.92,2.39-2.54 | 36.8/2.02-2.07,2.32-<br>2.60 | 37.3/2.52-2.72,2.19          | 37.8/2.08,2.20 | 36.5/1.99,1.91 | 34.7/2.00,1.98 | 34.7/2.02,2.24 | 39.1/2.12,1.93 | 36.8/2.10-<br>2.34 | 39.0/2.23      |
| C <sub>7</sub> /H <sub>7</sub>   | 173.7/-             | 173.8/-                      | 173.6/-                      | 175.0/-        | 177.4/-        | 175.3/-        | 173.9/-        | 174.0/-        | 175.6/-            | 175.6/-        |
| C <sub>8</sub> /H <sub>8</sub>   |                     |                              |                              |                |                |                | 51.9/3.60      | 51.7/3.64      | 53.0/3.67          | 53.5/3.65      |
| C <sub>1'</sub> /H <sub>1'</sub> | 172.7/-             | 172.2/-                      | 172.1,173.2/-                | 119.6/-        | 119.7/-        | 119.8/-        | 120.0/-        | 125.4/-        | 168.6/-            | 168.8/-        |
| C <sub>2'</sub> /H <sub>2'</sub> | 29.4/2.39-2.54      | 29.4/2.32-2.60               | 29.6,29.8/2.52-2.72          | 107.4/7.21     | 106.9/7.20     | 106.8/7.31     | 107.3/7.29     | 114.8/7.04     | 116.3/6.44         | 116.0/6.33     |
| C <sub>3'</sub> /H <sub>3'</sub> | 29.2/2.39-2.54      | 29.2/2.32-2.60               | 29.0,29.1/2.52-2.72          | 147.8/-        | 147.4/-        | 146.9/-        | 147.4/-        | 145.6/-        | 147.2/7.65         | 148.2/7.56     |
| C <sub>4'</sub> /H <sub>4'</sub> | 172.1/-             | 172.1/-                      | 172.1,172.5/-                | 141.1/-        | 140.5/-        | 139.9/-        | 140.5/-        | 148.5/-        | 126.8/-            | 127.0/-        |



|                                                          |                       |                       |                       |            |            |            |            |            |            |            |
|----------------------------------------------------------|-----------------------|-----------------------|-----------------------|------------|------------|------------|------------|------------|------------|------------|
| C <sub>5</sub> /H <sub>5</sub> <sup>+</sup>              |                       |                       |                       | 147.8/-    | 147.4/-    | 146.9/-    | 147.4/-    | 115.7/6.74 | 106.9/-    | 107.3/6.77 |
| C <sub>6</sub> /H <sub>6</sub> <sup>+</sup>              |                       |                       |                       | 107.4/7.21 | 106.9/7.20 | 106.8/7.31 | 107.3/7.29 | 121.4/6.98 | 149.5/-    | 149.8/-    |
| C <sub>7</sub> /H <sub>7</sub> <sup>+</sup>              |                       |                       |                       | 165.5/-    | 164.7/-    | 164.7/-    | 165.1/-    | 145.4/7.48 | 139.5/-    | 140.0/-    |
| C <sub>8</sub> /H <sub>8</sub> <sup>+</sup>              |                       |                       |                       | 56.3/3.79  | 55.9/3.72  | 55.5/3.81  | 56.1/3.81  | 113.9/6.26 | 149.5/-    | 149.8/-    |
| C <sub>9</sub> /H <sub>9</sub> <sup>+</sup>              |                       |                       |                       | 56.3/3.79  | 55.9/3.72  | 55.5/3.81  | 56.1/3.81  | 165.9/-    | 106.9/6.90 | 107.3/6.77 |
| C <sub>10</sub> /H <sub>10</sub> <sup>+</sup>            |                       |                       |                       |            |            |            |            | 56.0/3.76  | 56.8/3.86  | 57.2/3.75  |
| C <sub>11</sub> /H <sub>11</sub> <sup>+</sup>            |                       |                       |                       |            |            |            |            | 56.0/3.76  | 56.8/3.86  | 57.2/3.75  |
| Caffeoyl                                                 |                       |                       |                       |            |            |            |            |            |            |            |
| C <sub>1</sub> <sup>+</sup> /H <sub>1</sub> <sup>+</sup> | 125.9,126.0/-         | 126.0,126.0/-         | 127.4,127.5/-         | 125.6/-    | 125.4/-    | 125.0/-    | 125.3/-    | 124.4/-    | 168.0/     | 168.3/-    |
| C <sub>2</sub> <sup>+</sup> /H <sub>2</sub> <sup>+</sup> | 115.4,115.4/7.07,7.07 | 115.3,115.4/7.06,7.06 | 115.4,115.5/7.15,7.22 | 115.2/7.00 | 115.8/7.01 | 114.3/7.04 | 114.7/7.03 | 106.2/6.95 | 114.8/6.20 | 114.9/6.09 |
| C <sub>3</sub> <sup>+</sup> /H <sub>3</sub> <sup>+</sup> | 146.1,146.1/-         | 146.1,146.1/-         | 146.3,146.3/-         | 145.9/-    | 145.6/-    | 145.0/-    | 145.6/-    | 148.0/-    | 147.4/7.52 | 148.1/7.43 |
| C <sub>4</sub> <sup>+</sup> /H <sub>4</sub> <sup>+</sup> | 149.0,149.0/-         | 148.9,149.0/-         | 148.9,149.0/-         | 148.8/-    | 148.5/-    | 147.8/-    | 148.5/-    | 138.3/-    | 127.6/-    | 127.9/-    |
| C <sub>5</sub> <sup>+</sup> /H <sub>5</sub> <sup>+</sup> | 116.3,116.4/6.78,6.78 | 116.3,116.4/6.77,6.79 | 116.3,116.4/6.86,6.87 | 116.0/6.74 | 113.9/6.74 | 115.2/6.77 | 115.8/6.77 | 148.0/-    | 115.1/7.02 | 115.6/6.93 |
| C <sub>6</sub> <sup>+</sup> /H <sub>6</sub> <sup>+</sup> | 122.6,122.7/7.01,7.01 | 121.7,121.9/7.01,7.01 | 122.7,122.8/7.04,7.11 | 121.7/6.95 | 121.4/6.93 | 120.7/6.99 | 121.3/6.99 | 106.2/6.95 | 146.9/-    | 147.2/-    |
| C <sub>7</sub> <sup>+</sup> /H <sub>7</sub> <sup>+</sup> | 145.8,145.8/7.49,7.50 | 146.1,146.1/7.48,7.48 | 146.5,147.0/7.56,7.65 | 145.9/7.43 | 145.4/7.43 | 144.4/7.44 | 145.3/7.42 | 145.5/7.50 | 149.8/-    | 150.2/-    |
| C <sub>8</sub> <sup>+</sup> /H <sub>8</sub> <sup>+</sup> | 114.5,114.6/6.25,6.27 | 114.0,114.8/6.20,6.24 | 115.0,115.2/6.25,6.42 | 113.9/6.15 | 114.0/6.24 | 113.8/6.18 | 113.8/6.15 | 115.0/6.46 | 116.5/6.75 | 116.9/6.67 |
| C <sub>9</sub> <sup>+</sup> /H <sub>9</sub> <sup>+</sup> | 166.5,165.6/-         | 165.7,166.2/-         | 166.3,166.5/-         | 166.0/-    | 165.9/-    | 165.2/-    | 165.3/-    | 165.8/-    | 123.1/6.94 | 123.5/6.83 |

|               |                             |                             |                                |                     |                     |                     |                     |                     |                     |                    |
|---------------|-----------------------------|-----------------------------|--------------------------------|---------------------|---------------------|---------------------|---------------------|---------------------|---------------------|--------------------|
|               | 100MHz, DMSO-d <sub>6</sub> | 100MHz, DMSO-d <sub>6</sub> |                                | 125MHz,             | 125MHz,             | 125MHz,             | 100MHz              | 100MHz,             | 125MHz,             | 75MHz,             |
| Determination | /                           | /                           | 126MHz, Acetone-d <sub>6</sub> | DMSO-d <sub>6</sub> | CD <sub>3</sub> OD |
| condition     | 400MHz,                     | 400MHz,                     | /                              | /                   | /                   | /                   | /                   | /                   | /                   | /                  |
|               | DMSO-d <sub>6</sub>         | DMSO-d <sub>6</sub>         | 500MHz, Acetone-d <sub>6</sub> | 500MHz,             | 500MHz,             | 500MHz,             | 400MHz              | 400MHz,             | 500MHz,             | 300MHz,            |
|               |                             |                             |                                | DMSO-d <sub>6</sub> | CD <sub>3</sub> OD |
| Reference     | [46]                        | [46]                        | [47]                           | [48]                | [48]                | [48]                | [49]                | [49]                | [50]                | [51]               |

---

**Table S8.** NMR Spectroscopic Data ( $\delta$ ) of Compounds 60~71

| No.                              | 60            | 61            | 62            | 63            | 64            | 65            | 66            | 67            | 68            | 69            | 70            | 71            |
|----------------------------------|---------------|---------------|---------------|---------------|---------------|---------------|---------------|---------------|---------------|---------------|---------------|---------------|
| Quinic acid                      |               |               |               |               |               |               |               |               |               |               |               |               |
| C <sub>1</sub> /H <sub>1</sub>   | 73.0/-        | 72.8/-        | 73.0/-        | 72.8/-        | 72.6/-        | 73.4/-        | 73.1/-        | 73.1/-        | 72.5/-        | 72.3/-        | 73.7/-        | 75.7/-        |
| C <sub>2</sub> /H <sub>2</sub>   | 36.0/2.16,1.9 | 37.5/1.91,2.1 | 35.6/2.25,1.9 | 35.0/2.19,1.9 | 34.6/2.23,2.0 | 36.9/2.15,2.0 | 36.1/2.24,2.0 | 36.0/2.05,1.9 | 35.1/2.24,1.9 | 35.4/2.10,1.9 | 34.4/2.12,1.9 | 37.5/2.23,2.1 |
|                                  | 8             | 8             | 7             | 7             | 2             | 4             | 1             | 7             | 8             | 2             | 4             | 1             |
| C <sub>3</sub> /H <sub>3</sub>   | 68.7/5.53     | 65.2/4.26     | 68.4/5.50     | 71.3/5.32     | 70.7/5.28     | 66.2/4.18     | 65.2/4.14     | 68.2/5.47     | 67.9/5.41     | 69.9/5.14     | 66.3/4.15     | 67.4/4.29     |
| C <sub>4</sub> /H <sub>4</sub>   | 73.8/4.96     | 73.1/4.98     | 72.8/4.97     | 68.5/3.85     | 67.5/3.88     | 73.0/4.99     | 72.1/4.99     | 72.6/5.00     | 72.5/4.99     | 67.0/3.80     | 72.7/4.93     | 74.8/5.02     |
| C <sub>5</sub> /H <sub>5</sub>   | 64.5/4.09     | 67.4/5.52     | 64.4/4.10     | 70.6/5.24     | 70.6/5.16     | 67.7/5.34     | 67.7/5.25     | 65.0/3.98     | 64.8/4.03     | 70.9/5.05     | 68.1/5.26     | 67.4/5.46     |
| C <sub>6</sub> /H <sub>6</sub>   | 39.6/1.98,1.9 | 37.5/2.02,2.1 | 39.4/2.01,1.9 | 36.0/2.00,2.0 | 37.0/2.14,2.0 | 37.5/2.13,1.9 | 37.5/2.23,1.8 | 39.4/1.90,1.8 | 39.4/2.11,1.9 | 34.4/2.12,1.9 | 37.9/2.15,1.8 | 36.9/1.99,2.1 |
|                                  | 1             | 6             | 8             | 2             | 6             | 1             | 9             | 9             | 2             | 4             | 7             | 1             |
| C <sub>7</sub> /H <sub>7</sub>   | 176.4/-       | 175.0/-       | 174.2/-       | 175.6/-       | 173.9/-       | 174.6/-       | 173.3/-       | 176.4/-       | 174.0/-       | 175.1/-       | 175.1/-       | 175.0/-       |
| C <sub>8</sub> /H <sub>8</sub>   |               |               | 51.8/3.63     |               | 51.9/3.59     |               | 51.9/3.59     |               | 51.7/3.62     |               |               |               |
| C <sub>1'</sub> /H <sub>1'</sub> | 121.0/-       | 121.4/-       | 120.7/-       | 121.3/-       | 121.4/-       | 127.5/-       | 127.5/-       | 127.5/-       | 127.5/-       | 48.1/-        | 48.6/-        | 167.9/-       |
| C <sub>2'</sub> /H <sub>2'</sub> | 112.9/7.42    | 112.8/7.42    | 112.8/7.42    | 113.1/7.50    | 113.0/7.51    | 118.2/7.24    | 118.2/7.26    | 118.1/7.21    | 118.2/7.21    | 43.9/1.69,1.5 | 44.4/1.69,1.5 | 48.7/3.29     |
|                                  |               |               |               |               |               |               |               |               |               | 2             | 4             |               |
| C <sub>3'</sub> /H <sub>3'</sub> | 147.2/-       | 147.2/-       | 147.2/-       | 147.1/-       | 147.2/-       | 129.9/-       | 129.9/-       | 129.8/-       | 129.9/-       | 63.9/3.90     | 64.3/3.90     | 170.0/-       |

|                                               |            |            |            |            |            |               |               |               |               |               |               |
|-----------------------------------------------|------------|------------|------------|------------|------------|---------------|---------------|---------------|---------------|---------------|---------------|
| C <sub>4</sub> /H <sub>4</sub> <sup>'</sup>   | 151.4/-    | 151.6/-    | 151.6/-    | 151.2/-    | 151.4/-    | 150.0/-       | 150.0/-       | 149.9/-       | 149.9/-       | 45.5/1.86,1.6 | 46.0/1.86,1.6 |
|                                               |            |            |            |            |            |               |               |               |               | 1             | 1             |
| C <sub>5</sub> /H <sub>5</sub> <sup>'</sup>   | 115.0/6.83 | 115.1/6.83 | 115.1/6.82 | 114.9/6.86 | 115.0/6.86 | 144.0/-       | 143.9/-       | 143.9/-       | 144.0/-       | 85.8/-        | 86.2/-        |
| C <sub>6</sub> /H <sub>6</sub> <sup>'</sup>   | 123.5/7.44 | 123.7/7.45 | 123.6/7.43 | 123.7/7.53 | 123.7/7.52 | 112.1/7.24    | 112.2/7.26    | 112.1/7.21    | 112.1/7.23    | 81.6/-        | 82.1/-        |
| C <sub>7</sub> /H <sub>7</sub> <sup>'</sup>   | 164.8/-    | 165.1/-    | 164.8/-    | 165.2/-    | 165.1/-    | 145.4/7.61    | 145.4/7.63    | 145.1/7.53    | 145.1/7.55    | 135.7/6.48    | 136.7/6.50    |
| C <sub>8</sub> /H <sub>8</sub> <sup>'</sup>   | 55.4/3.72  | 55.5/3.77  | 55.4/3.71  | 55.6/3.71  | 55.6/3.80  | 114.9/6.51    | 114.8/6.53    | 114.8/6.42    | 115.0/6.44    | 129.3/7.90    | 129.8/7.92    |
| C <sub>9</sub> /H <sub>9</sub> <sup>'</sup>   |            |            |            |            |            | 166.1/-       | 165.9/-       | 165.9/-       | 166.0/-       | 150.2/-       | 151.8/-       |
| C <sub>10</sub> /H <sub>10</sub> <sup>'</sup> |            |            |            |            |            | 131.8/-       | 131.8/-       | 131.8/-       | 131.8/-       | 117.4/5.76    | 117.0/5.78    |
| C <sub>11</sub> /H <sub>11</sub> <sup>'</sup> |            |            |            |            |            | 110.4/6.90    | 110.4/6.90    | 110.4/6.90    | 110.4/6.90    | 164.7/-       | 165.0/-       |
| C <sub>12</sub> /H <sub>12</sub> <sup>'</sup> |            |            |            |            |            | 147.6/-       | 147.5/-       | 147.6/-       | 147.6/-       | 75.4/3.62,3.5 | 75.8/3.60,3.5 |
|                                               |            |            |            |            |            |               |               |               |               | 4             | 2             |
| C <sub>13</sub> /H <sub>13</sub> <sup>'</sup> |            |            |            |            |            | 146.5/-       | 146.5/-       | 146.5/-       | 146.6/-       | 20.0/0.98     | 20.0/1.01     |
| C <sub>14</sub> /H <sub>14</sub> <sup>'</sup> |            |            |            |            |            | 115.3/6.74    | 115.2/6.75    | 115.1/6.74    | 115.3/6.74    | 16.1/0.77     | 16.6/0.80     |
| C <sub>15</sub> /H <sub>15</sub> <sup>'</sup> |            |            |            |            |            | 118.7/6.73    | 118.7/6.73    | 118.7/6.73    | 118.7/6.70    | 20.7/2.05     | 21.2/2.05     |
| C <sub>16</sub> /H <sub>16</sub> <sup>'</sup> |            |            |            |            |            | 87.9/5.52     | 87.9/5.52     | 87.9/5.52     | 88.0/5.52     |               |               |
| C <sub>17</sub> /H <sub>17</sub> <sup>'</sup> |            |            |            |            |            | 52.5/3.48     | 52.5/3.49     | 52.5/3.49     | 52.5/3.47     |               |               |
| C <sub>18</sub> /H <sub>18</sub> <sup>'</sup> |            |            |            |            |            | 62.6/3.72,3.6 | 62.6/3.72,3.6 | 62.5/3.71,3.6 | 62.5/3.72,3.6 |               |               |

|                                                          |                     |                       |                       |                       |                       | 5                     | 5                     | 5                     | 9                     |                       |                       |                       |
|----------------------------------------------------------|---------------------|-----------------------|-----------------------|-----------------------|-----------------------|-----------------------|-----------------------|-----------------------|-----------------------|-----------------------|-----------------------|-----------------------|
| C <sub>19</sub> /H <sub>19</sub> <sup>a</sup>            |                     |                       |                       |                       |                       | 55.6/3.73             | 55.6/3.73             | 55.6/3.73             | 55.6/3.72             |                       |                       |                       |
| C <sub>20</sub> /H <sub>20</sub> <sup>a</sup>            |                     |                       |                       |                       |                       | 55.8/3.80             | 55.8/3.81             | 55.7/3.78             | 55.7/3.77             |                       |                       |                       |
| Caffeoyl                                                 |                     |                       |                       |                       |                       |                       |                       |                       |                       |                       |                       |                       |
|                                                          | 125.4/-             | 125.3/-               | 125.1/-               | 125.5/-               | 125.0/-               | 125.4/-               | 125.0/-               | 125.4/-               | 124.9/-               | 125.6/-               | 125.9/-               | 126.4/-               |
| C <sub>1</sub> <sup>a</sup> /H <sub>1</sub> <sup>a</sup> |                     |                       |                       |                       |                       |                       |                       |                       |                       |                       |                       |                       |
| C <sub>2</sub> <sup>a</sup> /H <sub>2</sub> <sup>a</sup> | 114.7/6.99          | 114.8/7.03            | 114.6/6.98            | 114.8/7.04            | 114.5/7.02            | 114.8/7.01            | 114.6/7.01            | 114.8/7.03            | 115.0/7.02            | 114.8/7.05            | 115.3/7.05            | 113.9/6.98            |
| C <sub>3</sub> <sup>a</sup> /H <sub>3</sub> <sup>a</sup> | 145.5/-             | 145.5/-               | 145.7/-               | 145.0/-               | 145.4/-               | 145.5/-               | 145.7/-               | 145.6/-               | 145.7/-               | 145.5/-               | 146.0/-               | 145.4/-               |
| C <sub>4</sub> <sup>a</sup> /H <sub>4</sub> <sup>a</sup> | 148.4/-             | 148.5/-               | 148.9/-               | 148.4/-               | 148.9/-               | 148.5/-               | 148.9/-               | 148.4/-               | 148.0/-               | 148.4/-               | 148.9/-               | 148.3/-               |
| C <sub>5</sub> <sup>a</sup> /H <sub>5</sub> <sup>a</sup> | 115.7/6.73          | 115.7/6.73            | 115.7/6.72            | 115.7/6.77            | 115.8/6.75            | 115.3/6.74            | 115.3/6.76            | 115.3/6.73            | 115.8/6.74            | 115.4/6.76            | 116.1/6.75            | 115.1/6.71            |
| C <sub>6</sub> <sup>a</sup> /H <sub>6</sub> <sup>a</sup> | 121.3/6.91          | 121.4/6.93            | 121.4/6.90            | 121.4/6.99            | 121.4/6.98            | 121.4/6.96            | 121.4/6.96            | 121.4/6.98            | 121.7/6.95            | 121.5/6.98            | 121.9/6.98            | 121.7/6.90            |
| C <sub>7</sub> <sup>a</sup> /H <sub>7</sub> <sup>a</sup> | 145.2/7.42          | 145.5/7.42            | 145.4/7.41            | 145.6/7.45            | 145.8/7.42            | 145.5/7.42            | 145.7/7.41            | 145.3/7.47            | 145.2/7.74            | 145.1/7.45            | 146.0/7.44            | 146.1/7.47            |
| C <sub>8</sub> <sup>a</sup> /H <sub>8</sub> <sup>a</sup> | 113.9/6.21          | 113.6/6.13            | 113.6/6.20            | 114.2/6.18            | 113.4/6.13            | 113.6/6.15            | 113.1/6.12            | 113.9/6.26            | 113.3/6.23            | 114.1/6.13            | 114.0/6.15            | 113.4/6.15            |
| C <sub>9</sub> <sup>a</sup> /H <sub>9</sub> <sup>a</sup> | 165.9/-             | 165.7/-               | 165.9/-               | 165.8/-               | 165.4/-               | 165.5/-               | 165.2/-               | 165.8/-               | 165.8/-               | 165.4/-               | 165.9/-               | 166.4/-               |
| Determination condition                                  | 75MHz,              | 125MHz,               |
|                                                          | CD <sub>3</sub> OD/ | DMSO-d <sub>6</sub> / |
|                                                          | 300MHz,             | 500MHz,               |
|                                                          | CD <sub>3</sub> OD  | DMSO-d <sub>6</sub>   |
| Reference                                                | [51]                | [50]                  | [50]                  | [50]                  | [50]                  | [50]                  | [50]                  | [50]                  | [50]                  | [50]                  | [52]                  | [52]                  |

**Table S9.** NMR Spectroscopic Data ( $\delta$ ) of Compounds 72~81

| No.                                            | 72         | 73              | 74          | 75          | 76          | 77         | 78         | 79         | 80          | 81         |
|------------------------------------------------|------------|-----------------|-------------|-------------|-------------|------------|------------|------------|-------------|------------|
| Caffeoyl                                       |            |                 |             |             |             |            |            |            |             |            |
| C <sub>1</sub> /H <sub>1</sub> <sup>1</sup>    |            | 129.3/-         | 128.12/-    | 127.67/-    | 127.70/-    | 125.4/-    | 128.3/-    | 127.2/-    | 125.94/-    | 126.0/-    |
| C <sub>2</sub> /H <sub>2</sub> <sup>2</sup>    |            | 127.0/-         | 115.27/7.03 | 115.34/7.04 | 115.36/7.05 | 115.8/7.05 | 118.5/7.55 | 123.8/-    | 130.88/-    | 128.5/-    |
| C <sub>3</sub> /H <sub>3</sub> <sup>3</sup>    |            | 144.1/-         | 146.85/-    | 147.03/-    | 147.03/-    | 145.6/-    | 147.6/-    | 145.5/-    | 146.06/-    | 144.4/-    |
| C <sub>4</sub> /H <sub>4</sub> <sup>4</sup>    |            | 145.9/-         | 149.50/-    | 150.10/-    | 150.07/-    | 148.6/-    | 151.6/-    | 145.0/-    | 147.42/-    | 148.3/-    |
| C <sub>5</sub> /H <sub>5</sub> <sup>5</sup>    |            | 113.3/6.72      | 116.60/6.77 | 116.66/6.78 | 116.66/6.78 | 116.9/6.78 | 117.9/6.88 | 115.1/6.75 | 115.95/6.83 | 114.8/6.70 |
| C <sub>6</sub> /H <sub>6</sub> <sup>6</sup>    |            | 119.0/7.09-6.93 | 123.04/6.91 | 123.38/6.95 | 123.37/6.96 | 121.5/7.02 | 126.7/7.20 | 119.8/7.14 | 121.72/7.21 | 120.1/7.06 |
| C <sub>7</sub> /H <sub>7</sub> <sup>7</sup>    |            | 146.1/7.78      | 146.79/7.51 | 148.14/7.55 | 148.09/7.56 | 146.4/7.46 | 147.5/7.62 | 148.7/7.89 | 145.79/8.06 | 147.6/8.01 |
| C <sub>8</sub> /H <sub>8</sub> <sup>8</sup>    |            | 124.4/6.17      | 115.77/6.27 | 114.23/6.26 | 114.29/6.27 | 113.5/6.24 | 115.6/6.39 | 116.7/6.28 | 116.10/6.33 | 115.2/6.23 |
| C <sub>9</sub> /H <sub>9</sub> <sup>9</sup>    |            | 168.4/-         | 169.24/-    | 168.50/-    | 168.54/-    | 165.9/-    | 168.7/-    | 168.5/-    | 166.85/-    | 168.5/-    |
| C <sub>10</sub> /H <sub>10</sub> <sup>10</sup> |            |                 |             |             |             |            |            | 32.2/3.84  |             |            |
| C <sub>11</sub> /H <sub>11</sub> <sup>11</sup> |            |                 |             |             |             |            |            | 175.7/-    |             |            |
| Dan Shen Su                                    |            |                 |             |             |             |            |            |            |             |            |
| C <sub>1</sub> /H <sub>1</sub>                 | 129.1/-    |                 | 131.29/-    | 128.89/-    | 128.87/-    | 131.7/-    | 129.7/-    | 129.6/-    | 129.14/-    | 128.7/-    |
| C <sub>2</sub> /H <sub>2</sub>                 | 116.9/6.62 |                 | 117.63/6.77 | 117.67/6.70 | 117.75/6.72 | 114.9/6.76 | 118.1/6.78 | 117.6/6.74 | 117.14/6.82 | 117.3/6.60 |

|                                  |                 |                 |                 |                 |                |                |                |                 |                |
|----------------------------------|-----------------|-----------------|-----------------|-----------------|----------------|----------------|----------------|-----------------|----------------|
| C <sub>3</sub> /H <sub>3</sub>   | 144.7/-         | 146.08/-        | 146.37/-        | 146.37/-        | 145.6/-        | 146.5/-        | 146.3/-        | 144.73/-        | 146.2/-        |
| C <sub>4</sub> /H <sub>4</sub>   | 143.6/-         | 144.93/-        | 145.55/-        | 145.56/-        | 144.1/-        | 145.7/-        | 145.4/-        | 143.94/-        | 145.3/-        |
| C <sub>5</sub> /H <sub>5</sub>   | 115.2/6.60      | 116.34/6.68     | 116.45/6.69     | 116.44/6.70     | 116.5/6.97     | 116.8/6.72     | 116.4/6.70     | 114.76/6.71     | 116.3/6.58     |
| C <sub>6</sub> /H <sub>6</sub>   | 120.1/6.45      | 121.89/6.63     | 121.92/6.57     | 121.99/6.58     | 120.1/6.66     | 122.3/6.63     | 122.0/6.62     | 120.32/6.62     | 122.0/6.44     |
| C <sub>7</sub> /H <sub>7</sub>   | 39.6/2.77,2.58  | 38.93/2.94,3.10 | 38.05/3.06,3.00 | 38.07/3.31,3.03 | 36.3/3.06,2.94 | 38.3/3.03,3.11 | 38.1/3.09,2.99 | 37.49/3.10,2.99 | 37.9/2.94,2.91 |
| C <sub>8</sub> /H <sub>8</sub>   | 71.7/4.01       | 77.79/5.09      | 74.82/5.19      | 74.95/5.15      | 73.1/5.06      | 75.1/5.20      | 75.3/5.14      | 73.74/5.21      | 74.5/5.12      |
| C <sub>9</sub> /H <sub>9</sub>   | 175.6/-         | 177.64/-        | 172.34/-        | 171.91/-        | 171.1/-        | 173.8/-        | 173.4/-        | 171.11/-        | 172.2/-        |
| C <sub>10</sub> /H <sub>10</sub> |                 |                 | 52.82/3.70      | 62.57/4.15      |                |                |                |                 | 52.7/3.63      |
| C <sub>11</sub> /H <sub>11</sub> |                 |                 |                 | 14.52/1.21      |                |                |                |                 |                |
| C <sub>1'</sub> /H <sub>1'</sub> | 135.9/-         |                 |                 |                 | 102.4/4.63     | 104.6/4.85     |                | 127.57/-        | 131.3/-        |
| C <sub>2'</sub> /H <sub>2'</sub> | 116.2/7.09-6.93 |                 |                 |                 | 73.3/-         | 75.3/3.54      |                | 119.76/7.13     | 114.0/6.98     |
| C <sub>3'</sub> /H <sub>3'</sub> | 147.1/-         |                 |                 |                 | 77.1/-         | 78.9/3.54      |                | 145.66/-        | 146.5/-        |
| C <sub>4'</sub> /H <sub>4'</sub> | 163.5/-         |                 |                 |                 | 69.8/-         | 71.9/3.42      |                | 146.38/-        | 146.8/-        |
| C <sub>5'</sub> /H <sub>5'</sub> | 116.7/6.72      |                 |                 |                 | 75.8/-         | 78.0/3.54      |                | 113.71/6.85     | 116.4/6.69     |
| C <sub>6'</sub> /H <sub>6'</sub> | 119.5/6.72      |                 |                 |                 | 60.7/-         | 63.0/3.75,3.99 |                | 120.24/6.93     | 120.4/6.81     |
| C <sub>7'</sub> /H <sub>7'</sub> | 146.1/6.46      |                 |                 |                 |                |                |                | 137.44/7.16     | 137.9/6.57     |
| C <sub>8'</sub> /H <sub>8'</sub> | 124.4/7.09-6.93 |                 |                 |                 |                |                |                | 116.24/6.72     | 120.7/7.08     |

|                         |                     |                   |                    |                    |                    |                     |                    |                    |                     |                    |
|-------------------------|---------------------|-------------------|--------------------|--------------------|--------------------|---------------------|--------------------|--------------------|---------------------|--------------------|
|                         | 150MHz,             | 101MHz,           | 125MHz,            | 125MHz,            | 125MHz,            | 100MHz,             | 125MHz,            | 125MHz,            |                     | 125MHz,            |
|                         | DMSO-d <sub>6</sub> | CDCl <sub>3</sub> | CD <sub>3</sub> OD | CD <sub>3</sub> OD | CD <sub>3</sub> OD | DMSO-d <sub>6</sub> | CD <sub>3</sub> OD | CD <sub>3</sub> OD | DMSO-d <sub>6</sub> | CD <sub>3</sub> OD |
| Determination condition | /                   | /                 | /                  | /                  | /                  | /                   | /                  | /                  | /                   | /                  |
|                         | 600MHz,             | 400MHz,           | 500MHz,            | 500MHz,            | 500MHz,            | 400MHz,             | 500MHz,            | 500MHz,            | DMSO-d <sub>6</sub> | 500MHz,            |
|                         | DMSO-d <sub>6</sub> | CDCl <sub>3</sub> | CD <sub>3</sub> OD | CD <sub>3</sub> OD | CD <sub>3</sub> OD | DMSO-d <sub>6</sub> | CD <sub>3</sub> OD | CD <sub>3</sub> OD |                     | CD <sub>3</sub> OD |
| Reference               | [53]                | [54]              | [55]               | [55]               | [55]               | [56]                | [57]               | [58]               | [59]                | [60]               |

---



**Table S10.** NMR Spectroscopic Data ( $\delta$ ) of Compounds 82~91

| No.                            | 82         | 83         | 84         | 85         | 86         | 87                         | 88         | 89         | 90              | 91         |
|--------------------------------|------------|------------|------------|------------|------------|----------------------------|------------|------------|-----------------|------------|
| Caffeoyl                       |            |            |            |            |            |                            |            |            |                 |            |
| C <sub>1</sub> /H <sub>1</sub> | 123.8/-    | 126.5/-    | 125.6/-    | 132.5/-    | 123.4/-    | 125.80/-                   | 124.7/-    | 122.4/-    | 125.9/-         | 124.3/-    |
| C <sub>2</sub> /H <sub>2</sub> | 129.8/-    | 132.9/-    | 131.7/-    | 124.8/6.77 | 123.9/7.47 | 120.55/-                   | 127.6/-    | 126.8/-    | 127.3/6.70      | 127.4/-    |
| C <sub>3</sub> /H <sub>3</sub> | 148.3/-    | 144.5/-    | 144.5/-    | 143.9/-    | 116.2/6.89 | 144.31/-                   | 148.9/-    | 147.1/-    | 148.6/-         | 146.1/-    |
| C <sub>4</sub> /H <sub>4</sub> | 145.0/-    | 148.2/-    | 146.4/-    | 152.2/-    | 150.8/-    | 149.72/-                   | 145.2/-    | 145.3/-    | 146.7/-         | 148.4/-    |
| C <sub>5</sub> /H <sub>5</sub> | 117.1/6.72 | 115.3/6.88 | 113.0/6.89 | 123.3/-    | 144.8/-    | 115.66/6.83                | 118.3/6.82 | 116.8/6.63 | 117.2/6.73      | 118.0/6.66 |
| C <sub>6</sub> /H <sub>6</sub> | 123.0/7.06 | 119.9/7.38 | 118.4/7.42 | 132.8/6.78 | 131.1/-    | 123.73/6.83                | 122.0/7.21 | 120.6/6.51 | 121.6/6.74      | 121.2/6.74 |
| C <sub>7</sub> /H <sub>7</sub> | 145.2/7.62 | 146.9/7.92 | 145.5/7.91 | 143.7/7.88 | 142.5/7.82 | 139.73/7.54                | 144.1/7.83 | 143.1/-    | 143.9/3.33,3.03 | 142.8/7.70 |
| C <sub>8</sub> /H <sub>8</sub> | 115.9/6.25 | 116.5/6.47 | 115.4/6.48 | 117.4/6.22 | 116.0/6.34 | 127.00/-                   | 116.5/6.34 | 115.6/-    | 116.2/5.90      | 117.8/6.23 |
| C <sub>9</sub> /H <sub>9</sub> | 168.3/-    | 174.5/-    | 170.8/-    | 168.1/-    | 166.7/-    | 168.88/-                   | 168.2/-    | 166.1/-    | 167.9/-         | 169.4/-    |
| Dan Shen Su                    |            |            |            |            |            | 131.51/-                   |            |            |                 |            |
| C <sub>1</sub> /H <sub>1</sub> | 129.2/-    | 129.9/-    | 127.5/-    | 129.3/-    | 127.9/-    | 130.83/-                   | 129.3/-    | 126.8/-    | 128.3/-         |            |
| C <sub>2</sub> /H <sub>2</sub> | 117.6/6.74 | 117.8/6.80 | 116.3/6.74 | 117.6/6.70 | 116.1/6.64 | 118.09/6.83<br>117.39/6.48 | 117.7/6.77 | 117.2/6.64 | 118.4/-         |            |
| C <sub>3</sub> /H <sub>3</sub> | 146.2/-    | 146.4/-    | 144.7/-    | 146.2/-    | 143.9/-    | 145.40/-                   | 146.1/-    | 145.8/-    | 147.5/-         |            |

|                                  |                |                |                |                |                |                 |                |            |            |            |
|----------------------------------|----------------|----------------|----------------|----------------|----------------|-----------------|----------------|------------|------------|------------|
|                                  |                |                |                |                |                | 144.99/-        |                |            |            |            |
|                                  |                |                |                |                |                | 144.31/-        |                |            |            |            |
| C <sub>4</sub> /H <sub>4</sub>   | 145.3/-        | 145.4/-        | 144.7/-        | 145.3/-        | 146.0/-        |                 | 145.3/-        | 144.3/-    | 143.7/-    |            |
|                                  |                |                |                |                |                | 143.80/-        |                |            |            |            |
|                                  |                |                |                |                |                | 116.98/6.76     |                |            |            |            |
| C <sub>5</sub> /H <sub>5</sub>   | 116.3/6.69     | 116.9/6.66     | 114.6/6.60     | 116.3/6.66     | 114.9/6.65     |                 | 116.4/6.69     | 117.1/6.92 | 115.1/7.23 |            |
|                                  |                |                |                |                |                | 117.09/6.57     |                |            |            |            |
|                                  |                |                |                |                |                | 122.66/6.67     |                |            |            |            |
| C <sub>6</sub> /H <sub>6</sub>   | 121.8/6.60     | 122.0/6.72     | 121.7/6.71     | 121.8/6.57     | 120.4/6.53     |                 | 121.8/6.63     | 120.7/7.34 | 120.5/7.04 |            |
|                                  |                |                |                |                |                | 122.21/6.11     |                |            |            |            |
|                                  |                |                |                |                |                | 38.50/2.95,3.08 |                |            |            |            |
| C <sub>7</sub> /H <sub>7</sub>   | 37.9/3.09,3.00 | 38.3/3.14,3.04 | 36.5/3.60,3.06 | 37.9/3.05,2.96 | 36.5/3.00,2.96 |                 | 38.0/3.00,3.07 | 36.4/7.64  | 37.7/7.75  |            |
|                                  |                |                |                |                |                | 37.95/2.67,2.88 |                |            |            |            |
|                                  |                |                |                |                |                | 77.92/4.93      |                |            |            |            |
| C <sub>8</sub> /H <sub>8</sub>   | 74.6/5.19      | 75.4/5.24      | 73.1/5.25      | 74.7/5.14      | 73.3/5.14      |                 | 74.8/5.17      | 73.3/6.43  | 74.5/6.56  |            |
|                                  |                |                |                |                |                | 78.44/4.83      |                |            |            |            |
|                                  |                |                |                |                |                | 178.09/-        |                |            |            |            |
| C <sub>9</sub> /H <sub>9</sub>   | 173.4/-        | 169.0/-        | 167.1/-        | 173.5/-        | 172.1/-        |                 | 173.5/-        | 173.1/-    | 173.6/-    |            |
|                                  |                |                |                |                |                | 177.77/-        |                |            |            |            |
| C <sub>10</sub> /H <sub>10</sub> |                |                | 51.5/3.74      |                |                |                 |                |            | 52.6/3.68  |            |
| C <sub>17</sub> /H <sub>17</sub> | 134.7/-        | 123.6/-        | 120.4/-        | 125.3/7.28     | 121.9/-        | 133.67/-        | 133.9/-        | 131.1/-    | 133.1/-    | 133.5/-    |
| C <sub>27</sub> /H <sub>27</sub> | 114.1/6.87     | 113.6/-        | 112.0/-        | 117.5/6.82     | 142.3/-        | 116.18/6.58     | 113.5/6.80     | 113.1/6.65 | 114.8/6.74 | 113.6/6.68 |
| C <sub>37</sub> /H <sub>37</sub> | 146.5/-        | 146.1/-        | 144.0/-        | 125.0/-        | 108.3/6.84     | 145.30/-        | 146.6/-        | 144.9/-    | 145.3/-    | 144.7/-    |

|                            |                                                            |                    |                    |                    |                |                                     |                                     |                    |                    |                    |                                     |
|----------------------------|------------------------------------------------------------|--------------------|--------------------|--------------------|----------------|-------------------------------------|-------------------------------------|--------------------|--------------------|--------------------|-------------------------------------|
|                            | C <sub>4</sub> <sup>a</sup> /H <sub>4</sub> <sup>a</sup>   | 146.5/-            | 145.2/-            | 143.7/-            | 109.7/6.80     | 150.8/-                             | 144.08/-                            | 146.7/-            | 144.4/-            | 143.4/-            | 144.7/-                             |
|                            | C <sub>5</sub> <sup>a</sup> /H <sub>5</sub> <sup>a</sup>   | 116.3/6.76         | 111.9/-            | 110.5/-            | 147.3/-        | 146.9/-                             | 116.90/6.57                         | 116.4/6.76         | 114.8/6.63         | 116.3/6.82         | 116.2/7.14                          |
|                            | C <sub>6</sub> <sup>a</sup> /H <sub>6</sub> <sup>a</sup>   | 118.9/6.78         | 118.9/-            | 117.6/-            | 148.3/-        | 114.1/6.63                          | 120.17/6.20                         | 118.4/6.72         | 117.6/6.51         | 116.0/6.81         | 117.8/6.82                          |
|                            | C <sub>7</sub> <sup>a</sup> /H <sub>7</sub> <sup>a</sup>   | 86.2/5.71          | 159.6/-            | 158.5/-            | 115.5/6.59     | 131.4/6.87                          | 40.38/4.45                          | 88.8/5.92          | 87.5/5.81,4.33     | 88.4/6.34          | 88.0/5.85                           |
|                            | C <sub>8</sub> <sup>a</sup> /H <sub>8</sub> <sup>a</sup>   | 39.3/3.74,3.26     | 99.5/-             | 97.1/-             | 152.3/-        | 123.6/6.84                          | 47.41/4.28                          | 57.6/4.38          | 56.0/-             | 57.1/4.47          | 57.2/4.31                           |
|                            | C <sub>9</sub> <sup>a</sup> /H <sub>9</sub> <sup>a</sup>   |                    |                    |                    |                |                                     | 174.14/-                            | 175.2/-            | 170.1/-            | 171..8/-           | 174.0/-                             |
|                            | C <sub>10</sub> <sup>a</sup> /H <sub>10</sub> <sup>a</sup> |                    |                    |                    |                |                                     |                                     |                    | 52.2/3.61          | 53.2/3.63          |                                     |
| Determination<br>condition | 125MHz,                                                    |                    |                    |                    |                |                                     |                                     |                    |                    |                    |                                     |
|                            | MeOH-d <sub>4</sub> +0.1%                                  | 125MHz,            | 150MHz,            |                    |                | 125MHz,                             | 75MHz,                              | 125.77MHz          | 150MHz,            | 150MHz,            | (CD <sub>3</sub> ) <sub>2</sub> CO- |
|                            | TFA                                                        | CD <sub>3</sub> OD | CD <sub>3</sub> OD |                    |                | CD <sub>3</sub> OD                  | D <sub>2</sub> O/CD <sub>3</sub> OD | CD <sub>3</sub> OD | CD <sub>3</sub> OD | CD <sub>3</sub> OD | D <sub>2</sub> O(10 : 1)            |
|                            | /                                                          | /                  | /                  | CD <sub>3</sub> OD | /              | /                                   | /                                   | /                  | /                  | /                  | /                                   |
|                            | 500MHz,                                                    | 600MHz,            | 600MHz,            |                    | 500Hz, DMSO-   | 300MHz,                             | 500.16MHz                           | 600MHz,            | 600MHz,            | 600MHz,            | (CD <sub>3</sub> ) <sub>2</sub> CO- |
|                            | MeOH-d <sub>4</sub> +0.1%                                  | CD <sub>3</sub> OD | CD <sub>3</sub> OD |                    | d <sub>6</sub> | D <sub>2</sub> O/CD <sub>3</sub> OD | CD <sub>3</sub> OD                  | CD <sub>3</sub> OD | CD <sub>3</sub> OD | CD <sub>3</sub> OD | D <sub>2</sub> O(10 : 1)            |
|                            | TFA                                                        |                    |                    |                    |                |                                     |                                     |                    |                    |                    |                                     |
| Reference                  | [61]                                                       | [62]               | [63]               | [64]               | [65]           | [66]                                | [67]                                | [63]               | [63]               | [63]               | [68]                                |

**Table S11.** NMR Spectroscopic Data ( $\delta$ ) of Compounds 92~102

| No.                                         | 92          | 93         | 94          | 95         | 96         | 97         | 98         | 99         | 100        | 101        | 102        |
|---------------------------------------------|-------------|------------|-------------|------------|------------|------------|------------|------------|------------|------------|------------|
| Caffeoyl                                    |             |            |             |            |            |            |            |            |            |            |            |
| C <sub>1</sub> /H <sub>1</sub> <sup>r</sup> | 124.55/-    | 123.2/-    | 124.58/-    | 125.9/-    | 124.4/-    | 123.7/-    | 123.8/-    | 130.7/-    | 131.2/-    | 127.2/-    | 126.1/-    |
| C <sub>2</sub> /H <sub>2</sub> <sup>r</sup> | 126.07/-    | 148.2/-    | 126.39/-    | 127.5/-    | 128.5/-    | 126.4/-    | 126.3/-    | 116.2/7.06 | 118.0/6.91 | 114.5/6.94 | 114.9/-    |
| C <sub>3</sub> /H <sub>3</sub> <sup>r</sup> | 146.16/-    | 145.4/-    | 149.14/-    | 149.6/-    | 143.5/-    | 142.9/-    | 142.9/-    | 143.5/-    | 148.6/-    | 146.2/-    | 144.8/-    |
| C <sub>4</sub> /H <sub>4</sub> <sup>r</sup> | 148.57/-    | 116.9/6.77 | 145.12/-    | 146.5/-    | 148.5/-    | 147.7/-    | 147.7/-    | 143.3/-    | 151.1/-    | 151.0/-    | 147.1/-    |
| C <sub>5</sub> /H <sub>5</sub> <sup>r</sup> | 118.18/6.90 | 121.3/7.11 | 118.34/6.83 | 118.6/6.96 | 115.9/7.01 | 115.0/6.85 | 115.0/6.85 | 117.8/6.87 | 118.1/6.67 | 117.7/6.92 | 116.5/6.52 |
| C <sub>6</sub> /H <sub>6</sub> <sup>r</sup> | 121.61/7.24 | 123.2/-    | 121.88/7.15 | 124.7/6.99 | 121.4/7.40 | 118.4/7.31 | 118.4/7.29 | 122.8/7.04 | 124.8/6.75 | 125.3/7.17 | 118.4/7.27 |
| C <sub>7</sub> /H <sub>7</sub> <sup>r</sup> | 142.84/7.62 | 142.4/7.53 | 143.85/7.54 | 145.0/7.33 | 143.6/7.56 | 143.7/7.41 | 143.7/7.41 | 145.1/7.45 | 148.2/7.32 | 146.7/7.48 | 143.6/7.42 |
| C <sub>8</sub> /H <sub>8</sub> <sup>r</sup> | 117.14/6.28 | 115.5/6.25 | 116.58/6.30 | 117.7/6.14 | 115.9/6.28 | 113.9/6.27 | 114.0/6.27 | 115.7/6.30 | 118.0/6.14 | 114.8/6.17 | 119.9/6.24 |
| C <sub>9</sub> /H <sub>9</sub> <sup>r</sup> | 166.64/-    | 166.7/-    | 167.98/-    | 170.4/-    | 167.1/-    | 166.0/-    | 165.9/-    | 168.1/-    | 171.4/-    | 167.2/-    | 166.0/-    |
| Dan Shen Su                                 | 128.69/-    | 126.9/-    | 129.05/-    | 133.4/-    | 128.6/-    |            |            |            |            |            |            |
| C <sub>1</sub> /H <sub>1</sub>              | 129.11/-    | 127.7/-    | 128.66/-    | 130.8/-    | 128.4/-    | 127.1/-    | 127.2/-    | 128.0/-    | 133.0/-    | 129.0/-    | 127.3/-    |
| C <sub>2</sub> /H <sub>2</sub>              | 116.11/6.67 | 116.4/6.48 | 117.53/6.78 | 119.6/6.99 | 116.9/-    |            |            |            |            |            |            |
|                                             | 116.79/6.71 | 116.4/6.71 | 117.53/6.54 | 119.2/6.53 | 118.0/-    | 116.5/6.62 | 116.5/6.62 | 117.0/6.76 | 119.9/6.91 | 117.2/6.72 | 117.0/-    |
| C <sub>3</sub> /H <sub>3</sub>              | 145.95/-    | 143.8/-    | 145.17/-    | 146.6/-    | 145.2/-    | 143.9/-    | 143.9/-    | 145.1/-    | 146.5/-    | 146.1/-    | 142.9/-    |

|                                  |             |                |             |                |             |                |                |                |                |                |                |
|----------------------------------|-------------|----------------|-------------|----------------|-------------|----------------|----------------|----------------|----------------|----------------|----------------|
|                                  | 144.63/-    | 144.8/-        | 145.26/-    | 146.3/-        | 144.8/-     |                |                |                |                |                |                |
|                                  | 145.52/-    | 143.7/-        | 146.47/-    | 145.6/-        | 144.1/-     |                |                |                |                |                |                |
| C <sub>4</sub> /H <sub>4</sub>   | 144.36/-    | 144.6/-        | 145.92/-    | 145.2/-        | 144.9/-     | 144.8/-        | 144.9/-        | 148.1/-        | 145.3/-        | 145.2/-        | 143.9/-        |
|                                  |             |                |             |                | 116.0/6.60- |                |                |                |                |                |                |
| C <sub>5</sub> /H <sub>5</sub>   | 116.08/6.65 | 114.9/6.56     | 116.45/6.69 | 119.1/6.92     | 6.90        | 115.5/6.63     | 115.5/6.63     | 116.9/6.69     | 118.6/6.87     | 116.0/6.67     | 115.4/6.63     |
|                                  | 117.31/6.74 | 114.9/6.64     | 116.36/5.59 | 118.8/6.66     | 115.3/-     |                |                |                |                |                |                |
|                                  |             |                |             |                |             |                |                |                |                |                |                |
| C <sub>6</sub> /H <sub>6</sub>   | 121.71/6.45 | 120.7/6.33     | 122.27/6.64 | 124.6/6.79     | 121.5/-     |                |                |                |                |                |                |
|                                  | 121.80/6.70 | 120.8/6.57     | 121.73/6.32 | 123.9/6.25     | 121.8/-     | 120.0/6.47     | 120.1/6.45     | 121.3/6.58     | 124.76.79      | 121.5/6.58     | 122.7/6.42     |
|                                  |             |                |             |                |             |                |                |                |                |                |                |
| C <sub>7</sub> /H <sub>7</sub>   | 37.41/3.06  | 36.1/2.54,2.45 | 37.79/3.00  | 39.7/3.15,3.06 | 36.9/7.97   |                |                |                |                |                |                |
|                                  | 37.05/3.06  | 36.4/3.02,2.98 | 37.48/3.00  | 38.3/3.04,2.75 | 37.0/-      | 36.0/2.85,2.91 | 36.1/2.83,2.91 | 37.7/2.83,3.01 | 39.6/3.00,3.14 | 36.9/2.96,3.06 | 36.1/2.89,2.89 |
|                                  |             |                |             |                |             |                |                |                |                |                |                |
| C <sub>8</sub> /H <sub>8</sub>   | 73.87/5.21  | 74.4/4.35      | 74.72/5.16  | 77.1/5.32      | 73.7/-      |                |                |                |                |                |                |
|                                  | 74.87/5.22  | 73.3/5.11      | 75.26/4.69  | 77.3/5.20      | 74.4/-      | 72.8/4.93      | 72.9/4.92      | 76.2/4.90      | 79.2/5.05      | 73.9/5.13      | 73.0/4.90      |
|                                  |             |                |             |                |             |                |                |                |                |                |                |
| C <sub>9</sub> /H <sub>9</sub>   | 171.63/-    | 171.0/-        | 173.36/-    | 174.9/-        | 172.7/-     |                |                |                |                |                |                |
|                                  | 170.77/-    | 171.2/-        | 52.67/3.64  | 175.6/-        | 171.9/-     | 170.6/-        | 170.6/-        | 176.3/-        | 179.9/-        | 172.6/-        | 170.8/-        |
|                                  |             |                |             |                |             |                |                |                |                |                |                |
| C <sub>10</sub> /H <sub>10</sub> |             |                |             | 62.6/4.08      |             |                |                |                |                |                |                |
|                                  |             |                |             | 14.4/1.13      |             |                |                |                |                |                |                |
|                                  |             |                |             |                |             |                |                |                |                |                |                |
| C <sub>11</sub> /H <sub>11</sub> | 133.28/-    | 127.8/-        | 133.54/-    | 134.6/-        | 125.9/-     | 126.0/-        | 126.0/-        | 129.5/-        | 134.8/-        | 125.5/-        | 126.5/-        |

|                                                          |                     |                         |                           |                  |         |            |            |                    |                  |                         |            |
|----------------------------------------------------------|---------------------|-------------------------|---------------------------|------------------|---------|------------|------------|--------------------|------------------|-------------------------|------------|
| C <sub>2</sub> <sup>o</sup> /H <sub>2</sub> <sup>o</sup> | 113.21/6.82         | 113.6/6.90              | 113.35/6.76               | 115.9/6.92       | 118.1/- | 117.3/6.44 | 117.3/6.43 | 114.8/6.84         | 117.9/7.07       | 117.8/7.30              | 113.9/-    |
| C <sub>3</sub> <sup>o</sup> /H <sub>3</sub> <sup>o</sup> | 145.47/-            | 144.4/-                 | 146.72/-                  | 146.8/-          | 144.4/- | 144.8/-    | 144.8/-    | 145.3/-            | 146.5/-          | 146.4/-                 | 144.8/-    |
| C <sub>4</sub> <sup>o</sup> /H <sub>4</sub> <sup>o</sup> | 144.66/-            | 143.9/-                 | 146.15/-                  | 145.3/-          | 147.9/- | 147.2/-    | 147.2/-    | 145.8/-            | 146.4/-          | 148.8/-                 | 147.8/-    |
| C <sub>5</sub> <sup>o</sup> /H <sub>5</sub> <sup>o</sup> | 115.95/6.80         | 114.7/6.68              | 116.39/6.77               | 120.1/6.97       | 117.1/- | 115.3/6.55 | 115.3/6.55 | 116.9/6.61         | 118.9/6.89       | 116.1/6.75              | 115.3/-    |
| C <sub>6</sub> <sup>o</sup> /H <sub>6</sub> <sup>o</sup> | 117.14/6.83         | 118.4/6.68              | 118.35/6.66               | 120.4/6.77       | 124.5/- | 122.9/6.43 | 122.9/6.43 | 119.2/6.69         | 122.7/6.92       | 124.7/7.11              | 123.7/6.42 |
| C <sub>7</sub> <sup>o</sup> /H <sub>7</sub> <sup>o</sup> | 87.54/5.87          | 87.0/5.90               | 88.12/5.86                | 89.4/5.94        | 144.3/- | 141.1/7.69 | 141.1/7.69 | 77.2/5.27          | 76.4/5.09        | 129.1/7.34              | 140.6/7.64 |
| C <sub>8</sub> <sup>o</sup> /H <sub>8</sub> <sup>o</sup> | 57.06/4.47          | 53.2/4.77               | 59.75/4.35                | 58.6/4.33        | 122.2/- | 123.4/-    | 123.3/-    | 78.5/4.63          | 86.7/4.70        | 139.2/-                 | 124.4/7.64 |
| C <sub>9</sub> <sup>o</sup> /H <sub>9</sub> <sup>o</sup> | 171.20/-            | 170.0/-                 | 172.32/-                  | 174.7/-          | 167.5/- | 168.4/-    | 168.4/-    | 173.4/-            | 178.6/-          | 166.0/-                 | 168.7/-    |
| Determination<br>condition                               |                     | 100MHz,                 |                           | 125MHz,          |         | 125MHz,    | 125MHz,    | 125MHz,            | 75MHz,           | 100MHz,                 |            |
|                                                          | DMSO-d <sub>6</sub> | methanol-d <sub>4</sub> | 500MHz,                   | D <sub>2</sub> O | DMSO    | DMSO       | DMSO       | CD <sub>3</sub> OD | D <sub>2</sub> O | methanol-d <sub>4</sub> | DMSO       |
|                                                          | /                   | /                       | DMSO-d <sub>6</sub>       | /                | /       | /          | /          | /                  | /                | /                       | /          |
|                                                          |                     |                         | /                         |                  |         |            |            |                    |                  |                         |            |
|                                                          | DMSO-d <sub>6</sub> | 400MHz,                 |                           | 500MHz,          | DMSO    | 500MHz,    | 500MHz,    | 400MHz,            | 300MHz,          | 400MHz,                 | DMSO       |
|                                                          |                     |                         | 600MHz, CDC <sub>13</sub> |                  |         |            |            |                    |                  |                         |            |
|                                                          |                     | methanol-d <sub>4</sub> |                           | D <sub>2</sub> O |         | DMSO       | DMSO       | CD <sub>3</sub> OD | D <sub>2</sub> O | methanol-d <sub>4</sub> |            |
| Reference                                                | [59]                | [60]                    | [70]                      | [71]             | [72]    | [73]       | [73]       | [74]               | [75]             | [76]                    | [72]       |

**Table S12.** NMR Spectroscopic Data ( $\delta$ ) of Compounds 103~113

| No.                             | 103        | 104             | 105                 | 106             | 107         | 108         | 109        | 110        | 111        | 112        | 113        |
|---------------------------------|------------|-----------------|---------------------|-----------------|-------------|-------------|------------|------------|------------|------------|------------|
| Caffeoyl                        |            |                 |                     |                 |             |             |            |            |            |            |            |
| C <sub>1</sub> /H <sub>1</sub>  | 129.3/-    | 130.87/-        | 127.8/-             | 126.30/-        | 126.34/-    | 126.40/-    | 127.9/-    | 127.9/-    | 122.7/-    | 127.7/-    | 127.2/-    |
| C <sub>2</sub> /H <sub>2</sub>  | 116.5/7.12 | 115.17/7.13     | 115.0,115.1/7.04    | 115.62/7.13     | 115.50/7.00 | 115.67/6.98 | 115.5/7.05 | 115.3/7.07 | 114.7/6.93 | 115.2/7.05 | 116.1/7.08 |
| C <sub>3</sub> /H <sub>3</sub>  | 147.6/-    | 147.84/-        | 146.7/-             | 122.79/-        | 146.39/-    | 146.42/-    | 149.5/-    | 149.6/-    | 151.6/-    | 146.8/-    | 146.0/-    |
| C <sub>4</sub> /H <sub>4</sub>  | 147.2/-    | 148.01/-        | 149.7/-             | 115.75/-        | 149.24/-    | 149.26/-    | 146.8/-    | 146.8/-    | 151.2/-    | 149.6/-    | 148.8/-    |
| C <sub>5</sub> /H <sub>5</sub>  | 115.2/7.10 | 117.49/7.22     | 116.6/6.78          | 123.21/7.07     | 116.66/6.65 | 116.67/6.72 | 116.5/6.78 | 116.6/6.79 | 117.9/6.72 | 116.2/6.77 | 114.5/6.80 |
| C <sub>6</sub> /H <sub>6</sub>  | 121.0/7.06 | 121.41/7.06     | 123.0/6.94          | 116.49/6.87     | 122.40/6.90 | 122.25/6.94 | 123.0/6.95 | 123.1/6.97 | 120.3/6.72 | 123.0/6.94 | 122.6/6.95 |
| C <sub>7</sub> /H <sub>7</sub>  | 144.0/7.43 | 134.25/7.58     | 147.1,147.2/7.56    | 148.15/7.68     | 114.71/6.24 | 146.22/7.43 | 169.1/-    | 168.5/-    | 142.5/7.98 | 147.2/7.57 | 114.9/7.59 |
| C <sub>8</sub> /H <sub>8</sub>  | 118.0/6.31 | 114.61/6.34     | 115.2/6.27          | 113.45/6.34     | 146.12/7.42 | 114.87/6.22 | 115.2/6.33 | 115.3/6.29 | 117.7/6.55 | 115.0/6.29 | 146.8/6.30 |
| C <sub>9</sub> /H <sub>9</sub>  | 168.3/-    | 168.59/-        | 169.3/-             | 167.84/-        | 166.44/-    | 166.79/-    | 147.0/7.59 | 147.1/7.57 | 169.2/-    | 169.0/-    | 168.7/-    |
| Glc                             |            |                 |                     |                 |             |             |            |            |            |            |            |
| C <sub>1</sub> /H <sub>1'</sub> | 102.0/4.77 | 102.91/4.88     | 94.1,98.3/5.11,4.51 | 94.14/5.58      | 103.80/-    | 103.64/4.23 | 104.3/4.42 | 102.4/4.51 | 103.7/4.73 | 99.4/4.44  | 103.7/4.28 |
| C <sub>2</sub> /H <sub>2'</sub> | 73.7/3.50  | 74.16/3.47-3.59 | 73.8,76.3/3.17-4.50 | 68.82/3.39-3.83 | 74.21/-     | 74.47/-     | 73.6/3.39  | 76.3/4.81  | 74.9/3.45  | 80.8/3.19  | 74.2/3.20  |

|                                                          |                |                 |                         |                     |                     |             |                    |                    |                |                |                    |
|----------------------------------------------------------|----------------|-----------------|-------------------------|---------------------|---------------------|-------------|--------------------|--------------------|----------------|----------------|--------------------|
| C <sub>3</sub> /H <sub>3</sub> <sup>r</sup>              | 76.2/3.50      | 76.91/3.47-3.59 | 75.6,78.0/3.17-<br>4.50 | 69.63/3.39-<br>3.83 | 77.32/-             | 75.45/-     | 79.0/5.04          | 75.3/3.57          | 77.8/3.48      | 74.9/3.62      | 77.3/3.33-<br>3.58 |
| C <sub>4</sub> /H <sub>4</sub> <sup>r</sup>              | 70.2/3.39      | 70.65/3.47-3.59 | 72.1,71.9/3.17-<br>4.50 | 72.24/3.39-<br>3.83 | 70.92/-             | 72.17/4.59  | 69.9/3.54          | 71.9/3.40          | 71.7/3.42      | 72.0/3.46      | 71.0/3.33-<br>3.58 |
| C <sub>5</sub> /H <sub>5</sub> <sup>r</sup>              | 77.7/3.50      | 77.76/3.47-3.59 | 70.9,74.9/3.17-<br>4.50 | 75.49/3.39-<br>3.83 | 74.40/-             | 74.94/-     | 77.8/3.38          | 78.1/3.32          | 75.4/3.67      | 77.2/3.72      | 74.8/3.33-<br>3.58 |
| C <sub>6</sub> /H <sub>6</sub> <sup>r</sup>              | 61.7/3.45,3.44 | 61.76/3.75-3.94 | 64.9,65.0/3.17-<br>4.50 | 77.01/3.39-<br>3.83 | 64.37/5.12,<br>4.98 | 61.71/-     | 62.4/3.71,3.88     | 62.7/3.70,3.89     | 64.7/4.36,4.54 | 64.5/4.33,4.55 | 64.2/4.33,4.49     |
| C <sub>1</sub> <sup>r</sup> /H <sub>1</sub> <sup>r</sup> |                |                 |                         |                     | 130.17/-            | 130.11/-    | 131.5/-            | 131.6/-            | 153.7/-        | 129.9/-        | 68.7/-             |
| C <sub>2</sub> <sup>r</sup> /H <sub>2</sub> <sup>r</sup> |                |                 |                         |                     | 117.11/6.55         | 117.16/6.57 | 116.3/6.69         | 116.2/6.61         | 119.5/6.96     | 114.8/6.84     | 153.6/6.97         |
| C <sub>3</sub> <sup>r</sup> /H <sub>3</sub> <sup>r</sup> |                |                 |                         |                     | 145.76/-            | 145.81/-    | 144.7/-            | 144.6/-            | 116.6/6.68     | 146.5/-        | 127.6/6.09         |
| C <sub>4</sub> <sup>r</sup> /H <sub>4</sub> <sup>r</sup> |                |                 |                         |                     | 144.28/-            | 144.35/-    | 146.1/-            | 146.0/-            | 152.3/-        | 146.3/-        | 187.3/-            |
| C <sub>5</sub> <sup>r</sup> /H <sub>5</sub> <sup>r</sup> |                |                 |                         |                     | 116.32/6.52         | 116.33/6.59 | 117.1/6.67         | 117.1/6.58         | 116.6/6.68     | 116.5/6.73     | 127.6/6.09         |
| C <sub>6</sub> <sup>r</sup> /H <sub>6</sub> <sup>r</sup> |                |                 |                         |                     | 120.38/6.42         | 120.42/6.46 | 121.3/6.56         | 121.4/6.48         | 119.5/6.96     | 119.5/6.70     | 153.6/6.97         |
| C <sub>7</sub> <sup>r</sup> /H <sub>7</sub> <sup>r</sup> |                |                 |                         |                     | 71.06/-             | 71.03/-     | 72.2/3.73,4.04     | 71.8/3.64,3.99     |                | 78.7/4.53      | 65.6/3.94,3.66     |
| C <sub>8</sub> <sup>r</sup> /H <sub>8</sub> <sup>r</sup> |                |                 |                         |                     | 35.99/-             | 35.91/-     | 36.6/2.78          | 36.6/2.67          |                | 72.8/3.65,3.93 | 40.4/2.05          |
| Determination                                            | 125MHz,        | 75.46MHz,       | 100MHz,                 | 75MHz,              | 75MHz,              | 75MHz,      | CD <sub>3</sub> OD | CD <sub>3</sub> OD | 125MHz,        | 100.6MHz       | 100MHz,            |



|           |                    |                    |                         |                   |                             |                             |                    |                    |                    |                    |                    |
|-----------|--------------------|--------------------|-------------------------|-------------------|-----------------------------|-----------------------------|--------------------|--------------------|--------------------|--------------------|--------------------|
| condition | CD <sub>3</sub> OD | CD <sub>3</sub> OD | methanol-d <sub>4</sub> | CDCl <sub>3</sub> | DMSO- <i>d</i> <sub>6</sub> | DMSO- <i>d</i> <sub>6</sub> | /                  | /                  | CD <sub>3</sub> OD | CD <sub>3</sub> OD | CD <sub>3</sub> OD |
|           | /                  | /                  | /                       | /                 | /                           | /                           | CD <sub>3</sub> OD | CD <sub>3</sub> OD | /                  | /                  | /                  |
|           | 500MHz,            | 300.13MHz,         | 400MHz,                 | 300MHz,           | 300MHz,                     | 300MHz,                     |                    |                    | 500MHz,            | CD <sub>3</sub> OD | 400MHz,            |
|           | CD <sub>3</sub> OD | CD <sub>3</sub> OD | CD <sub>3</sub> OD      | CDCl <sub>3</sub> | DMSO- <i>d</i> <sub>6</sub> | DMSO- <i>d</i> <sub>6</sub> |                    |                    | CD <sub>3</sub> OD |                    | CD <sub>3</sub> OD |
| Reference | [77]               | [78]               | [79]                    | [78]              | [80]                        | [80]                        | [81]               | [81]               | [82]               | [83]               | [84]               |

---

**Table S13.** NMR Spectroscopic Data ( $\delta$ ) of Compounds 114~124

| No.                              | 114        | 115            | 116        | 117        | 118        | 119        | 120            | 121        | 122        | 123                   | 124        |
|----------------------------------|------------|----------------|------------|------------|------------|------------|----------------|------------|------------|-----------------------|------------|
| Caffeoyl                         |            |                |            |            |            |            |                |            |            |                       |            |
| C <sub>1</sub> /H <sub>1</sub>   | 169.1/-    | 127.6/-        | 125.4/-    | 125.5/-    | 127.4/-    | 127.7/-    | 127.6/-        | 127.8/-    | 127.6/-    | 127.7,127.8/-         | 127.7/-    |
| C <sub>2</sub> /H <sub>2</sub>   | 114.8/6.28 | 115.1/7.05     | 114.8/7.07 | 114.7/7.04 | 115.1/7.04 | 115.2/7.04 | 115.2/7.07     | 115.3/7.07 | 115.2/7.09 | 114.4,114.9/7.05,7.06 | 114.8/7.04 |
| C <sub>3</sub> /H <sub>3</sub>   | 147.2/7.56 | 146.9/-        | 145.5/-    | 145.4/-    | 147.0/-    | 146.8/-    | 146.8/-        | 147.0/-    | 146.9/-    | 146.8,147.3/-         | 149.6/-    |
| C <sub>4</sub> /H <sub>4</sub>   | 127.7/-    | 149.7/-        | 148.3/-    | 148.0/-    | 150.1/-    | 149.7/-    | 149.8/-        | 149.9/-    | 149.8/-    | 149.6,149.9/-         | 147.3/-    |
| C <sub>5</sub> /H <sub>5</sub>   | 115.2/7.03 | 116.6/6.78     | 115.7/6.76 | 115.6/6.77 | 116.6/6.76 | 117.1/6.77 | 116.5/6.80     | 116.6/6.79 | 116.6/6.81 | 116.6/6.77,6.78       | 116.4/6.72 |
| C <sub>6</sub> /H <sub>6</sub>   | 146.8/-    | 123.1/6.96     | 121.3/6.97 | 121.3/7.01 | 123.1/6.94 | 123.0/6.95 | 123.1/6.97     | 123.3/7.97 | 123.2/6.99 | 123.1,123.3/6.95,6.96 | 123.2/6.91 |
| C <sub>7</sub> /H <sub>7</sub>   | 149.6/-    | 147.2/7.57     | 145.2/7.47 | 113.8/6.23 | 147.3/7.56 | 147.3/7.57 | 147.6/7.58     | 147.7/7.60 | 147.7/7.62 | 147.3,148.5/7.57,7.66 | 146.4/7.57 |
| C <sub>8</sub> /H <sub>8</sub>   | 116.5/6.76 | 114.9/6.29     | 113.2/6.29 | 145.5/7.49 | 114.8/6.27 | 115.1/6.28 | 114.5/6.32     | 114.6/6.32 | 114.5/6.34 | 115.3,115.4/6.29,6.32 | 115.4/6.29 |
| C <sub>9</sub> /H <sub>9</sub>   | 123.1/6.93 | 169.0/-        | 165.4/-    | 165.6/-    | 168.8/-    | 168.5/-    | 168.9/-        | 169.1/-    | 169.0/-    | 167.2,169.2/-         | 169/-      |
| Glc                              |            |                |            |            |            |            |                |            |            |                       |            |
| C <sub>1'</sub> /H <sub>1'</sub> | 99.2/4.59  | 99.4/4.70      | 102.4/4.31 | 102.2/4.37 | 104.3/4.31 | 104.5/4.33 | 98.9/4.70      | 99.8/4.80  | 99.7/4.82  | 95.8/5.60             | 99.9/4.73  |
| C <sub>2'</sub> /H <sub>2'</sub> | 74.4/3.25  | 74.8/3.25-3.27 | 73.6/3.18  | 73.8/3.21  | 75.0/3.22  | 75.0/3.18  | 73.8/3.65-3.67 | 75.0/3.28  | 74.9/3.30  | 74.1/3.43-3.50        | 74.8/3.30  |
| C <sub>3'</sub> /H <sub>3'</sub> | 77.4/3.39  | 77.6/3.38-3.40 | 81.3/3.41  | 78.8/3.69  | 77.9/3.36  | 78.1/3.33  | 78.1/3.29-3.31 | 77.8/3.42  | 77.7/3.44  | 78.0/3.43-3.50        | 77.8/3.40  |
| C <sub>4'</sub> /H <sub>4'</sub> | 71.7/3.40  | 71.7/3.38-3.40 | 68.4/3.24  | 69.3/4.64  | 71.5/3.30  | 71.5/3.30  | 71.6/3.28-3.30 | 71.9/3.28  | 71.8/3.29  | 71.4/3.43-3.50        | 71.7/3.39  |

|                                                          |                    |                              |                |                          |                 |                 |                              |                |                |                |                |
|----------------------------------------------------------|--------------------|------------------------------|----------------|--------------------------|-----------------|-----------------|------------------------------|----------------|----------------|----------------|----------------|
| C <sub>5</sub> /H <sub>5</sub> <sup>v</sup>              | 75.7/3.54-<br>3.57 | 75.8/3.50-3.52               | 73.4/3.49      | 72.7/3.65                | 78.0/3.29       | 78.1/3.28       | 74.7/3.15-3,17               | 78.8/3.30      | 78.6/3.37      | 76.4/3.68      | 75.7/3.55      |
| C <sub>6</sub> /H <sub>6</sub> <sup>v</sup>              | 64.5/4.48,4.35     | 64.1/4.46,3.40               | 63.2/4.20,4.39 | 67.0/3.42                | 62.7/3.65,3.85  | 62.7/3.65,3.82  | 62.7/3.88,3.67               | 63.1/3.93,3.65 | 63.0/3.67,3.95 | 64.4/4.50,4.32 | 64/4.40,4.53   |
| C <sub>1</sub> <sup>v</sup> /H <sub>1</sub> <sup>v</sup> | 93.1/5.65          | 97.9/4.60                    | 129.1/-        | 129.1/-                  | 114.6/5.25,5.34 | 113.3/5.25,5.23 | 93.1/5.67                    | 95.2/5.16      | 95.1/5.19      |                | 96/5.33        |
| C <sub>2</sub> <sup>v</sup> /H <sub>2</sub> <sup>v</sup> | 142.5/6.32         | 63.0/3.83-<br>3.85,3.39-3.41 | 116.2/6.61     | 115.3/6.64               | 145.4/-         | 147.1/-         | 95.9/5.32                    | 142.5/6.37     | 142.4/6.39     |                | 152.4/7.41     |
| C <sub>3</sub> <sup>v</sup> /H <sub>3</sub> <sup>v</sup> | 108.4/4.93         | 23.9/1.73-<br>1.75,1.56      | 144.9/-        | 144.6/-                  | 72.3/4.42       | 74.6/5.58       | 34.4/2.44-<br>2.46,2.36-2.38 | 103.1/4.98     | 103.0/5.00     |                | 115.9/-        |
| C <sub>4</sub> <sup>v</sup> /H <sub>4</sub> <sup>v</sup> | 72.8/-             | 38.3/2.00                    | 143.5/-        | 143.2/-                  | 74.0/3.91,3.76  | 71.9/4.12,3.85  | 34.7/2.09                    | 36.9/2.60      | 36.8/2.60      |                | 32.6/3.06      |
| C <sub>5</sub> <sup>v</sup> /H <sub>5</sub> <sup>v</sup> | 78.3/3.67          | 73.3/4.01                    | 115.4/6.58     | 116.2/6.63               | 65.4/4.79,4.73  | 63.9/4.18,4.14  | 87.7/5.01                    | 81.4/5.03      | 81.3/5.04      |                | 39.5/1.92,2.17 |
| C <sub>6</sub> <sup>v</sup> /H <sub>6</sub> <sup>v</sup> | 46.9/1.85,1.75     | 62.0/3.39-3.41               | 119.4/6.46     | 119.5/5.49               |                 |                 | 70.4/4.44                    | 60.4/3.70      | 60.3/3.72      |                | 82.3/4.90      |
| C <sub>7</sub> <sup>v</sup> /H <sub>7</sub> <sup>v</sup> | 78.4/-             | 66.0/-                       | 35.1/2.69,2.71 | 70.2/3.81                |                 |                 | 79.9/-                       | 67.0/-         | 66.9/-         |                | 43.1/2.42      |
| C <sub>8</sub> <sup>v</sup> /H <sub>8</sub> <sup>v</sup> | 59.5/2.54          | 43.3/2.28                    | 70.4/3.61,3.79 | 34.9/2.70                |                 |                 | 48.3/2.62                    | 43.3/2.62      | 43.2/2.65      |                | 43.4/2.48      |
| C <sub>9</sub> <sup>v</sup> /H <sub>9</sub> <sup>v</sup> | 25.0/1.18          | 61.5/4.07,3.64               |                |                          |                 |                 | 62.1/4.04,3.68               | 61.4/4.17,3.84 | 61.3/3.85,4.19 |                | 14.4/1.08      |
| C <sub>1</sub> <sup>v</sup> /H <sub>1</sub> <sup>v</sup> |                    |                              | 109.2/5.23     | 109.4/5.24<br>109.0/4.79 |                 |                 |                              |                |                |                | 170.6/-        |
| C <sub>2</sub> <sup>v</sup> /H <sub>2</sub> <sup>v</sup> |                    |                              | 76.0/3.82      | 75.8/3.70                |                 |                 |                              |                |                |                |                |

|  |                    |                    |                     |                     |                    |                    |                    |                    |                    |                         |                    |
|--|--------------------|--------------------|---------------------|---------------------|--------------------|--------------------|--------------------|--------------------|--------------------|-------------------------|--------------------|
|  |                    |                    |                     | 75.7/3.70           |                    |                    |                    |                    |                    |                         |                    |
|  |                    |                    |                     | 78.6/-              |                    |                    |                    |                    |                    |                         |                    |
|  |                    |                    | 79.0/-              | 78.1/-              |                    |                    |                    |                    |                    |                         |                    |
|  |                    |                    |                     | 73.6,               |                    |                    |                    |                    |                    |                         |                    |
|  |                    |                    | 73.6/3.63,4.01      | 73.3/3.60-          |                    |                    |                    |                    |                    |                         |                    |
|  |                    |                    |                     | 3.80                |                    |                    |                    |                    |                    |                         |                    |
|  |                    |                    |                     | 63.6,               |                    |                    |                    |                    |                    |                         |                    |
|  |                    |                    | 63.6/3.40           | 62.9/3.18-          |                    |                    |                    |                    |                    |                         |                    |
|  |                    |                    |                     | 3.30                |                    |                    |                    |                    |                    |                         |                    |
|  | 100MHz,            | 150MHz,            | 100MHz,             | 100MHz,             | 125MHz,            | 125MHz,            | 150MHz,            | 150MHz,            |                    | 100MHz,                 | 75MHz,             |
|  | CD <sub>3</sub> OD | CD <sub>3</sub> OD | DMSO-d <sub>6</sub> | DMSO-d <sub>6</sub> | CD <sub>3</sub> OD | methanol-d <sub>4</sub> | CD <sub>3</sub> OD |
|  | /                  | /                  | /                   | /                   | /                  | /                  | /                  | /                  | /                  | /                       | /                  |
|  | 400MHz,            | 600MHz,            | 400MHz,             | 400MHz,             | 500MHz,            | 500MHz,            | 600MHz,            | 600MHz,            | CD <sub>3</sub> OD | 400MHz,                 | 300MHz,            |
|  | CD <sub>3</sub> OD | CD <sub>3</sub> OD | DMSO-d <sub>6</sub> | DMSO-d <sub>6</sub> | CD <sub>3</sub> OD | CD <sub>3</sub> OD | CD <sub>3</sub> OD | CD <sub>3</sub> OD |                    | CD <sub>3</sub> OD      | CD <sub>3</sub> OD |
|  | [85]               | [86]               | [87]                | [88]                | [89]               | [89]               | [86]               | [90]               | [91]               | [79]                    | [92]               |

**Table S14.** NMR Spectroscopic Data ( $\delta$ ) of Compounds 125~135

| No.                            | 125        | 126        | 127        | 128        | 129        | 130        | 131        | 132                     | 133              | 134        | 135        |
|--------------------------------|------------|------------|------------|------------|------------|------------|------------|-------------------------|------------------|------------|------------|
| Caffeoyl                       |            |            |            | 125.3/-    | 128.9/-    | 128.4/-    |            |                         |                  |            |            |
|                                | 127.7/-    | 127.0/-    | 127.6/-    |            |            |            | 125.2/-    | 127.65,127.69/-         | 126.9/-          | 127.6/-    | 127.8/-    |
| C <sub>1</sub> /H <sub>1</sub> |            |            |            | 128.6/-    | 128.5/-    | 128.6/-    |            |                         |                  |            |            |
|                                |            |            |            | 114.9/7.06 | 115.1/7.12 | 115.1/7.18 |            |                         |                  |            | 114.8/6.6- |
| C <sub>2</sub> /H <sub>2</sub> | 115.1/7.04 | 115.8/-    | 115.1/-    | 115.1/7.18 | 114.9/7.19 | 115.1/7.18 | 113.3/7.06 | 115.21/7.07,7.06        | 115.7/7.60       | 114.7/7.07 | 7.1        |
|                                |            |            |            | 145.6/-    | 146.9/-    | 146.8/-    |            |                         |                  |            |            |
| C <sub>3</sub> /H <sub>3</sub> | 149.6/-    | 147.1/-    | 146.9/-    | 146.8/-    | 146.8/-    | 146.8/-    | 145.4/-    | 146.82/-                | 146.8/-          | 149.7/-    | 149.8/-    |
|                                |            |            |            | 148.7/-    | 146.9/-    | 147.7/-    |            |                         |                  |            |            |
| C <sub>4</sub> /H <sub>4</sub> | 146.7/-    | 150.4/-    | 149.7/-    | 147.5/-    | 147.5/-    | 147.5/-    | 148.5/-    | 149.74,149.78/-         | 147.5/-          | 146.7/-    | 146.9/-    |
|                                |            |            |            | 115.8/6.77 | 115.9/7.08 | 116.1/7.12 |            |                         |                  |            | 116.6/6.6- |
| C <sub>5</sub> /H <sub>5</sub> | 116.5/6.77 | 116.5/-    | 116.2/-    | 116.1/7.12 | 116.0/7.12 | 116.1/7.12 | 115.7/6.75 | 116.51/6.79             | 116.6/7.14       | 116.5/6.79 | 7.1        |
|                                |            |            |            | 121.7/7.02 | 120.3/6.96 | 121.2/7.12 |            |                         |                  |            | 123.2/6.6- |
| C <sub>6</sub> /H <sub>6</sub> | 123.2/6.88 | 122.2/-    | 123.2/-    | 120.9/7.12 | 120.8/7.12 | 120.9/7.12 | 121.6/7.02 | 123.24/6.97,6.96        | 122.2/7.17       | 123.2/6.95 | 7.1        |
|                                |            |            |            | 146.6/7.57 | 143.5/7.38 | 146.0/7.62 |            |                         |                  |            |            |
| C <sub>7</sub> /H <sub>7</sub> | 169.1/-    | 147.6/8.04 | 147.3/7.61 | 144.8/7.52 | 144.7/7.53 | 144.8/7.52 | 146.3/7.55 | 147.90,148.01/7.60      | 114.7,114.6/6.69 | 168.3/-    | 168.3/-    |
|                                |            |            |            |            |            |            |            |                         |                  |            |            |
| C <sub>8</sub> /H <sub>8</sub> | 114.9/6.28 | 115.2/6.83 | 114.7/6.35 | 113.2/6.26 | 117.5/6.24 | 115.3/6.45 | 114.8/6.25 | 114.70,114.85/6.29,6.28 | 146.4/8.00       | 115.3/6.28 | 115.4/-    |

|                                  |            |            |            |                |            |                |           |                       |                     |            |            |  |
|----------------------------------|------------|------------|------------|----------------|------------|----------------|-----------|-----------------------|---------------------|------------|------------|--|
|                                  |            |            |            | 115.8/6.45     | 115.8/6.45 | 115.8/6.44     |           |                       |                     |            |            |  |
|                                  |            |            |            | 165.2/-        | 167.7/-    | 165.1/-        |           |                       |                     |            |            |  |
| C <sub>9</sub> /H <sub>9</sub>   | 147.2/7.55 | 167.1/-    | 168.5/-    |                |            |                | 165.0/-   | 168.43,168.33/-       | 167.0/-             | 148.0/7.60 | 148.0/7.59 |  |
|                                  |            |            |            | 166.3/-        | 166.2/-    | 166.3/-        |           |                       |                     |            |            |  |
|                                  |            |            |            |                |            | 94.2/5.52      |           |                       |                     |            |            |  |
| Glc                              | 104.0/4.38 | 104.0/4.84 | 104.5/4.39 | 94.1/5.50      | 101.2/4.86 |                |           |                       |                     |            |            |  |
|                                  |            |            |            |                |            | 101.4/4.78     | 94.1/5.42 | 94.04,98.16/5.13,4.56 | 93.8,98.4/5.71,5.21 | 104.2/4.39 | 104.3/4.37 |  |
| C <sub>11</sub> /H <sub>11</sub> | 105.3/4.58 | 106.7/4.88 | 105.8/4.46 | 101.6/4.78     | 101.5/4.80 |                |           |                       |                     |            |            |  |
|                                  |            |            |            |                |            | 101.5/4.80     |           |                       |                     |            |            |  |
|                                  |            |            | 75.5/-     |                |            | 72.4/3.17-3.39 |           |                       |                     |            |            |  |
| C <sub>2</sub> /H <sub>2</sub>   | 74.4/3.43  | 76.3/-     |            | 72.4/3.20-3.38 | 75.5/3.30  |                |           |                       | 75.0,77.4/4.20-     |            |            |  |
|                                  |            |            | 76.1/6.60- |                |            | 75.8/3.17-3.39 | 72.5/-    | 76.12,77.38/3.56,3.38 |                     | 76.1/-     | 76.3/-     |  |
|                                  | 75.5/3.29  | 75.9/-     |            | 75.8/3.20-3.38 | 75.7/3.32  |                |           |                       | 4.25,4.06-4.11      |            |            |  |
|                                  |            |            | 7.20       |                |            | 75.8/3.17-3.39 |           |                       |                     |            |            |  |
|                                  |            |            | 84.1/-     |                |            | 76.1/3.17-3.39 |           |                       |                     |            |            |  |
| C <sub>3</sub> /H <sub>3</sub>   | 87.7/3.58  | 84.8/-     |            | 76.1/3.20-3.38 | 73.9/3.71  |                |           |                       | 78.0,80.4/4.87-     |            |            |  |
|                                  |            |            | 77.9/6.60- |                |            | 73.2/3.17-3.39 | 76.3/-    | 79.21,81.73/4.06,3.81 |                     | 81.6/-     | 81.7/-     |  |
|                                  | 77.8/3.41  | 78.1/-     |            | 73.2/3.20-3.38 | 73.3/3.32  |                |           |                       | 4.89,4.48-4.51      |            |            |  |
|                                  |            |            | 7.20       |                |            | 73.2/3.17-3.39 |           |                       |                     |            |            |  |
|                                  |            |            | 70.9/-     |                |            | 69.6/3.17-3.39 |           |                       |                     |            |            |  |
| C <sub>4</sub> /H <sub>4</sub>   | 70.3/3.47  | 71.5/-     |            | 69.6/3.20-3.38 | 69.7/3.20  |                |           |                       | 70.7,70.9/5.59-     |            |            |  |
|                                  |            |            | 71.6/6.60- |                |            | 69.8/3.17-3.39 | 70.6/-    | 70.70,70.80/4.94,4.93 |                     | 70.4/4.92  | 70.4/-     |  |
|                                  | 71.6/3.29  | 71.3/-     |            | 69.8/3.20-3.38 | 69.9/3.30  |                |           |                       | 5.62,4.90-4.92      |            |            |  |
|                                  |            |            | 7.20       |                |            | 69.8/3.17-3.39 |           |                       |                     |            |            |  |
|                                  |            |            |            |                |            |                |           |                       |                     |            |            |  |
|                                  | 75.0/3.58  | 76.2/-     |            | 74.6/3.58      | 73.2/3.30  | 74.6/3.51      |           |                       | 69.9,74.4/4.93-     |            |            |  |
| C <sub>5</sub> /H <sub>5</sub>   |            |            | 75.2/      |                |            |                | 76.3/-    | 71.23,74.71/4.02,3.58 |                     | 76.0/-     | 76.1/-     |  |
|                                  | 78.1/3.35  | 78.3/-     |            | 77.2/3.20-3.38 | 77.1/3.32  | 77.2/3.17-3.39 |           |                       | 4.96,4.15-4.18      |            |            |  |

|                                   |                |           |            |                |                |                |        |                       |                      |            |            |
|-----------------------------------|----------------|-----------|------------|----------------|----------------|----------------|--------|-----------------------|----------------------|------------|------------|
|                                   |                |           | 78.1/6.60- |                |                | 77.2/3.17-3.39 |        |                       |                      |            |            |
|                                   |                |           | 7.20       |                |                |                |        |                       |                      |            |            |
|                                   |                |           | 62.4/      |                |                | 63.4/4.41,4.16 |        |                       |                      |            |            |
| C <sub>6</sub> /H <sub>6</sub> '  | 64.6/4.34,4.52 | 62.7/-    | 62.7/6.60- | 63.4/4.41,4.16 | 63.3/4.23,4.46 | 60.7/3.70,3.47 | 66.5/- | 62.37,62.50/3.18,3.49 | 68.6/3.94-3.99,4.28- | 62.4/-     | 62.5/-     |
|                                   | 62.6/3.65,3.90 | 62.1/-    |            | 60.7/3.71,3.47 | 60.7/3.48,3.71 |                |        |                       | 4.34                 |            |            |
|                                   |                |           | 7.20       |                |                | 60.7/3.73,3.47 |        |                       |                      |            |            |
| C <sub>1</sub> "/H <sub>1</sub> " | 131.4/-        | 130.3/-   | 133.8/-    |                |                |                |        |                       | 111.0/5.64           | 139.9/-    | 130.8/-    |
|                                   |                |           |            |                |                |                |        |                       |                      |            | 116.2/6.6- |
| C <sub>2</sub> "/H <sub>2</sub> " | 117.1/6.68     | 116.7/-   | 114.8/-    |                |                |                |        |                       | 77.7,77.8/4.74       | 130.0/7.25 | 7.1        |
|                                   |                |           |            |                |                |                |        |                       |                      |            |            |
| C <sub>3</sub> "/H <sub>3</sub> " | 144.6/-        | 146.3/-   | 146.2/-    |                |                |                |        |                       | 80.3/-               | 129.3/7.25 | 130.9/6.6- |
|                                   |                |           |            |                |                |                |        |                       |                      |            | 7.1        |
|                                   |                |           |            |                |                |                |        |                       | 75.0/4.47-4.52,4.23- |            |            |
| C <sub>4</sub> "/H <sub>4</sub> " | 146.1/-        | 145.6/-   | 146.0/-    |                |                |                |        |                       | 4.27                 | 127.2/7.25 | 156.8/-    |
|                                   |                |           |            |                |                |                |        |                       |                      |            |            |
| C <sub>5</sub> "/H <sub>5</sub> " | 116.4/6.64     | 117.5/-   | 116.6/-    |                |                |                |        |                       | 65.4,65.3/4.08-4.10  | 129.3/7.25 | 130.8/6.6- |
|                                   |                |           |            |                |                |                |        |                       |                      |            | 7.1        |
|                                   |                |           |            |                |                |                |        |                       |                      |            | 116.2/6.6- |
| C <sub>6</sub> "/H <sub>6</sub> " | 121.3/6.54     | 120.5/-   | 119.1/-    |                |                |                |        |                       |                      | 130.0/7.25 | 7.1        |
|                                   |                |           |            |                |                |                |        |                       |                      |            |            |
| C <sub>7</sub> "/H <sub>7</sub> " | 72.4/3.72,3.96 | 36.1/2.96 | 73.5/-     |                |                |                |        |                       |                      | 71.8/-     | 72.4/-     |

|           |                                                              |                    |                    |                             |                             |                             |                               |                    |                                 |                    |                    |
|-----------|--------------------------------------------------------------|--------------------|--------------------|-----------------------------|-----------------------------|-----------------------------|-------------------------------|--------------------|---------------------------------|--------------------|--------------------|
|           | C <sub>8</sub> <sup>''</sup> /H <sub>8</sub> <sup>''</sup>   | 36.7/2.78          | 74.6/-             | 76.1/-                      |                             |                             |                               |                    |                                 | 37.2/2.94          | 36.4/2.84          |
|           | Rhamnose                                                     |                    |                    |                             |                             |                             |                               |                    |                                 |                    |                    |
|           | C <sub>1</sub> <sup>'''</sup> /H <sub>1</sub> <sup>'''</sup> |                    |                    |                             | 100.5/4.46                  | 103.03,103.12/5.20,5.15     | 102.8,102.9/6.30,6.27         | 103.0/5.20         | 103.0/5.19                      |                    |                    |
|           | C <sub>2</sub> <sup>'''</sup> /H <sub>2</sub> <sup>'''</sup> |                    |                    |                             | 70.3/-                      | 72.32/3.94                  | 72.5,72.6/4.84-4.86,4.78-4.80 | 72.1/-             | 72.3/-                          |                    |                    |
|           | C <sub>3</sub> <sup>'''</sup> /H <sub>3</sub> <sup>'''</sup> |                    |                    |                             | 70.0/-                      | 72.06/3.61                  | 72.4/4.39-4.45                | 72.3/-             | 72.2/-                          |                    |                    |
|           | C <sub>4</sub> <sup>'''</sup> /H <sub>4</sub> <sup>'''</sup> |                    |                    |                             | 71.9/-                      | 73.78,73.82/3.32,3.31       | 73.9/4.19-4.23                | 73.8/-             | 73.9/-                          |                    |                    |
|           | C <sub>5</sub> <sup>'''</sup> /H <sub>5</sub> <sup>'''</sup> |                    |                    |                             | 68.4/-                      | 70.38,70.70/3.58,3.57       | 70.1,69.8/4.44-4.52           | 70.6/-             | 70.7/-                          |                    |                    |
|           | C <sub>6</sub> <sup>'''</sup> /H <sub>6</sub> <sup>'''</sup> |                    |                    |                             | 18.0/-                      | 18.48/1.10                  | 18.9,19.0/1.62,1.53           | 18.5/1.10          | 18.4/1.09                       |                    |                    |
|           |                                                              | 125MHz             |                    |                             |                             |                             |                               |                    |                                 |                    |                    |
|           |                                                              | pyridine-          | 22.5MHz            | 100MHz,                     | 100MHz,                     | 100MHz,                     | 100MHz                        | 100MHz,            | 50.10MHz,                       | 125MHz,            |                    |
|           | CD <sub>3</sub> OD                                           | d <sub>5</sub>     | CD <sub>3</sub> OD | DMSO- <i>d</i> <sub>6</sub> | DMSO- <i>d</i> <sub>6</sub> | DMSO- <i>d</i> <sub>6</sub> | DMSO- <i>d</i> <sub>6</sub>   | CD <sub>3</sub> OD | C <sub>5</sub> D <sub>5</sub> N | CD <sub>3</sub> OD | CD <sub>3</sub> OD |
|           | /                                                            | /                  | /                  | /                           | /                           | /                           | /                             | /                  | /                               | /                  | /                  |
|           | condition                                                    | CD <sub>3</sub> OD | 600MHz             | 400MHz,                     | 400MHz,                     | 400MHz,                     | DMSO- <i>d</i> <sub>6</sub>   | 400MHz             | 400MHz,                         | 200.40MHz,         | 500MHz,            |
|           |                                                              | pyridine-          | CDCl <sub>3</sub>  | DMSO- <i>d</i> <sub>6</sub> | DMSO- <i>d</i> <sub>6</sub> | DMSO- <i>d</i> <sub>6</sub> |                               | CD <sub>3</sub> OD | C <sub>5</sub> D <sub>5</sub> N | CD <sub>3</sub> OD | CD <sub>3</sub> OD |
|           |                                                              | d <sub>5</sub>     |                    |                             |                             |                             |                               |                    |                                 |                    |                    |
| Reference | [81]                                                         | [93]               | [94]               | [95]                        | [95]                        | [95]                        | [96]                          | [97]               | [98]                            | [99]               | [100]              |



**Table S15.** NMR Spectroscopic Data ( $\delta$ ) of Compounds 136~146

| No.                              | 136        | 137        | 138         | 139        | 140         | 141         | 142        | 143         | 144           | 145        | 146           |
|----------------------------------|------------|------------|-------------|------------|-------------|-------------|------------|-------------|---------------|------------|---------------|
| Caffeoyl                         |            |            |             |            |             |             |            |             |               |            |               |
| C <sub>1</sub> /H <sub>1</sub>   | 125.4/-    | 125.5/-    | 128.37/-    | 125.6/-    | 127.68/-    | 127.68/-    | 125.5/-    | 127.66/-    | 127.7/-       | 127.7/-    | 127.7/-       |
| C <sub>2</sub> /H <sub>2</sub>   | 114.8/7.05 | 114.8/7.06 | 115.96/7.04 | 114.9/7.04 | 115.10/7.03 | 115.26/7.06 | 115.0/7.03 | 115.24/7.05 | 114.8/6.6-7.2 | 114.8/7.06 | 114.7/6.5-7.2 |
| C <sub>3</sub> /H <sub>3</sub>   | 145.6/-    | 145.6/-    | 147.36/-    | 145.5/-    | 146.73/-    | 146.85/-    | 145.5/-    | 146.79/-    | 149.6/-       | 149.7/-    | 149.6/-       |
| C <sub>4</sub> /H <sub>4</sub>   | 148.6/-    | 148.5/-    | 150.10/-    | 148.2/-    | 149.57/-    | 149.82/-    | 145.0/-    | 149.74/-    | 146.7/-       | 146.8/-    | 146.6/-       |
| C <sub>5</sub> /H <sub>5</sub>   | 115.8/6.76 | 115.8/6.76 | 117.04/6.76 | 115.7/6.75 | 116.54/6.76 | 116.56/6.78 | 115.8/6.75 | 116.5/6.77  | 116.2/6.6-7.2 | 116.6/6.78 | 116.4/6.5-7.2 |
| C <sub>6</sub> /H <sub>6</sub>   | 121.4/7.01 | 121.3/7.01 | 123.39/6.94 | 121.3/7.01 | 123.13/6.88 | 123.27/6.95 | 121.4/6.90 | 123.19/6.95 | 123.2/6.6-7.2 | 123.2/6.95 | 123.2/6.5-7.2 |
| C <sub>7</sub> /H <sub>7</sub>   | 145.6/7.50 | 145.2/7.49 | 147.48/7.58 | 144.9/7.47 | 147.23/7.55 | 148.06/7.59 | 148.4/7.55 | 147.98/7.59 | 168.3/-       | 168.3/-    | 168.1/-       |
| C <sub>8</sub> /H <sub>8</sub>   | 113.6/6.25 | 114.2/6.27 | 115.67/6.31 | 114.7/6.26 | 114.83/6.28 | 114.72/6.28 | 113.8/6.23 | 114.71/6.27 | 115.5/6.27    | 115.3/6.28 | 115.5/6.25    |
| C <sub>9</sub> /H <sub>9</sub>   | 165.9/-    | 165.7/-    | 169.57/-    | 166.1/-    | 169.13/-    | 168.34/-    | 166.5/-    | 168.27/-    | 147.9/7.61    | 148.0/7.60 | 148.1/7.59    |
| Glc                              |            |            |             |            |             |             |            |             |               |            |               |
| C <sub>1'</sub> /H <sub>1'</sub> | 102.9/4.31 | 100.2/4.49 | 104.89/4.40 | 102.7/4.34 | 104.35/4.32 | 104.22/4.42 | 101.3/4.32 | 104.18/4.37 | 104.1/4.40    | 104.2/4.38 | 101.6/4.50    |
| C <sub>2'</sub> /H <sub>2'</sub> | 73.0/3.41  | 73.4/4.64  | 74.03/3.36  | 71.4/3.18  | 75.65/3.32  | 76.22/3.46  | 77.6/3.37  | 76.18/3.39  | 76.0/-        | 76.0/-     | 75.1/-        |
| C <sub>3'</sub> /H <sub>3'</sub> | 73.5/3.10  | 74.1/3.42  | 79.49/5.02  | 77.5/4.88  | 83.96/3.52  | 81.70/3.84  | 82.1/3.78  | 81.62/3.81  | 81.6/-        | 81.6/-     | 80.3/-        |
| C <sub>4'</sub> /H <sub>4'</sub> | 71.0/4.66  | 70.7/3.44  | 70.56/3.51  | 68.1/3.28  | 70.37/3.41  | 70.60/3.43  | 70.5/3.56  | 70.58/4.91  | 70.3/-        | 70.4/4.92  | 70.7/-        |

|                                                            |                |                |                 |                |                 |                 |                |                 |               |            |               |
|------------------------------------------------------------|----------------|----------------|-----------------|----------------|-----------------|-----------------|----------------|-----------------|---------------|------------|---------------|
| C <sub>5</sub> /H <sub>5</sub> <sup>s</sup>                | 73.9/3.45      | 75.5/3.38      | 77.23/3.51      | 75.1/3.42      | 75.38/3.55      | 75.92/3.56      | 73.5/3.66      | 76.00/3.54      | 76.1/-        | 76.2/-     | 76.0/-        |
| C <sub>6</sub> /H <sub>6</sub> <sup>s</sup>                | 66.1/3.53,3.33 | 66.6/3.84,3.48 | 68.35/3.63,3.97 | 66.5/3.82,3.49 | 64.61/4.35,4.49 | 64.66/4.33,4.54 | 63.3/4.53,4.62 | 62.35/3.52,3.62 | 62.4/-        | 62.4/-     | 62.2/-        |
| Rhamnose                                                   |                |                |                 |                |                 |                 |                |                 |               |            |               |
| C <sub>1</sub> <sup>o</sup> /H <sub>1</sub> <sup>o</sup>   | 100.5/4.50     | 100.7/4.60     | 102.75/4.74     | 100.7/4.59     | 102.68/5.17     | 103.07/5.26     | 102.4/5.22     | 102.99/5.18     | 102.8/5.20    | 103.0/5.20 | 103.1/5.16    |
| C <sub>2</sub> <sup>o</sup> /H <sub>2</sub> <sup>o</sup>   | 70.6/3.59      | 70.5/3.63      | 72.89/3.84      | 70.6/3.62      | 72.38/3.95      | 72.37/3.92      | 72.3/3.90      | 72.33/3.91      | 72.1/-        | 72.1/-     | 72.0/-        |
| C <sub>3</sub> <sup>o</sup> /H <sub>3</sub> <sup>o</sup>   | 70.6/3.36      | 70.3/3.45      | 72.72/3.72      | 70.4/3.62      | 72.24/3.69      | 70.29/3.59      | 73.3/4.9       | 72.05/3.58      | 72.0/-        | 72.3/-     | 71.7/-        |
| C <sub>4</sub> <sup>o</sup> /H <sub>4</sub> <sup>o</sup>   | 71.9/3.57      | 72.0/3.19      | 74.56/3.36      | 71.9/3.44      | 73.98/3.39      | 75.53/4.78      | 75.4/4.7       | 73.78/3.29      | 73.8/-        | 73.8/-     | 73.6/-        |
| C <sub>5</sub> <sup>o</sup> /H <sub>5</sub> <sup>o</sup>   | 68.4/3.34      | 68.4/3.46      | 70.36/3.67      | 68.4/3.48      | 70.02/3.97      | 67.17/3.54      | 67.7/3.60      | 70.38/3.56      | 70.7/-        | 70.6/-     | 70.7/-        |
| C <sub>6</sub> <sup>o</sup> /H <sub>6</sub> <sup>o</sup>   | 17.8/1.05      | 18.0/1.14      | 18.54/1.26      | 17.9/1.13      | 17.85/1.24      | 18.4/1.10       | 17.8/1.06      | 18.42/1.09      | 18.4/1.11     | 18.5/1.10  | 18.4/1.07     |
| C <sub>7</sub> <sup>o</sup> /H <sub>7</sub> <sup>o</sup>   |                |                |                 |                |                 | 20.5/1.96       | 20.6/1.92      |                 | 56.6/3.86     | 56.6/3.81  | 20.9/1.99     |
| C <sub>8</sub> <sup>o</sup> /H <sub>8</sub> <sup>o</sup>   |                |                |                 |                |                 | 172.3/-         | 170.1/1.91     |                 |               |            | 171.5/-       |
| C <sub>9</sub> <sup>o</sup> /H <sub>9</sub> <sup>o</sup>   |                |                |                 |                |                 |                 | 20.8/-         |                 |               |            |               |
| C <sub>10</sub> <sup>o</sup> /H <sub>10</sub> <sup>o</sup> |                |                |                 |                |                 |                 | 171.9/-        |                 |               |            |               |
| C <sub>1</sub> <sup>o</sup> /H <sub>1</sub> <sup>o</sup>   | 129.2/-        | 129.1/-        | 131.96/-        | 129.5/-        | 131.40/-        | 131.5/-         | 129.1/-        | 131.47/-        | 131.6/-       | 132.9/-    | 131.9/-       |
| C <sub>2</sub> <sup>o</sup> /H <sub>2</sub> <sup>o</sup>   | 115.5/6.62     | 115.4/6.54     | 116.88/6.68     | 115.5/6.61     | 117.07/6.67     | 117.1/6.70      | 115.5/6.66     | 117.10/6.69     | 113.9/6.6-7.2 | 113.0/6.74 | 116.6/6.5-7.2 |
| C <sub>3</sub> <sup>o</sup> /H <sub>3</sub> <sup>o</sup>   | 144.9/-        | 144.9/-        | 145.21/-        | 144.7/-        | 146.08/-        | 146.1/-         | 145.3/-        | 146.09/-        | 148.8/-       | 147.5/-    | 144.4/-       |
| C <sub>4</sub> <sup>o</sup> /H <sub>4</sub> <sup>o</sup>   | 143.5/-        | 143.5/-        | 146.63/-        | 143.5/-        | 144.61/-        | 144.6/-         | 146.4/-        | 144.64/-        | 145.9/-       | 147.3/-    | 145.9/-       |

|                            |                     |                     |                    |                     |                    |                     |                     |                    |                         |                    |                         |
|----------------------------|---------------------|---------------------|--------------------|---------------------|--------------------|---------------------|---------------------|--------------------|-------------------------|--------------------|-------------------------|
| $C_5^m/H_5^m$              | 116.3/6.63          | 116.2/6.55          | 117.62/6.66        | 116.3/6.63          | 116.36/6.63        | 116.3/6.68          | 116.2/6.66          | 116.30/6.67        | 116.6/6.6-7.2           | 117.1/6.81         | 117.2/6.5-7.2           |
| $C_6^m/H_6^m$              | 119.5/6.49          | 119.6/6.41          | 121.80/6.55        | 119.5/6.48          | 121.26/6.53        | 121.3/6.56          | 119.5/6.51          | 121.25/6.56        | 122.4/6.6-7.2           | 121.2/6.68         | 121.4/6.5-7.2           |
| $C_7^m/H_7^m$              | 35.1/2.67           | 35.1/2.56           | 37.17/2.78         | 35.1/2.69           | 36.65/2.77         | 36.5/2.79           | 35.1/2.73           | 36.54/2.78         | 72.3/-                  | 72.1/-             | 72.5/                   |
| $C_8^m/H_8^m$              | 70.3/3.83,3.61      | 69.8/3.76,3.54      | 72.83/3.68,3.97    | 70.2/3.82,3.62      | 72.32/3.72,4.00    | 72.2/3.72,4.04      | 70.3/3.66           | 72.22/3.71,4.03    | 36.6/2.88               | 36.5/2.82          | 36.2/2.69               |
| Determination<br>condition | 100MHz,             | 100MHz,             | 125MHz,            | 100MHz,             | 150MHz,            | 125MHz,             | 125MHz,             | 150MHz,            | 22.5MHz,                | 50.10MHz,          | 22.5MHz,                |
|                            | DMSO-d <sub>6</sub> | DMSO-d <sub>6</sub> | CD <sub>3</sub> OD | DMSO-d <sub>6</sub> | CD <sub>3</sub> OD | DMSO-d <sub>6</sub> | DMSO-d <sub>6</sub> | CD <sub>3</sub> OD | Methanol-d <sub>4</sub> | CD <sub>3</sub> OD | Methanol-d <sub>4</sub> |
|                            | /                   | /                   | /                  | /                   | /                  | /                   | /                   | /                  | /                       | /                  | /                       |
|                            | 400MHz,             | 400MHz,             | 500MHz,            | 400MHz,             | 600MHz,            | 300MHz,             | 300MHz,             | 600MHz,            | 89.55MHz,               | 200.40MHz,         | 89.55MHz,               |
|                            | DMSO-d <sub>6</sub> | DMSO-d <sub>6</sub> | CD <sub>3</sub> OD | DMSO-d <sub>6</sub> | CD <sub>3</sub> OD | DMSO-d <sub>6</sub> | DMSO-d <sub>6</sub> | CD <sub>3</sub> OD | Methanol-d <sub>4</sub> | CD <sub>3</sub> OD | Methanol-d <sub>4</sub> |
| Reference                  | [101]               | [101]               | [102]              | [101]               | [103]              | [104]               | [104]               | [103]              | [105]                   | [99]               | [105]                   |

**Table S16.** NMR Spectroscopic Data ( $\delta$ ) of Compounds 147~154

| No.                              | 147        | 148                     | 149        | 150        | 151            | 152        | 153         | 154        |
|----------------------------------|------------|-------------------------|------------|------------|----------------|------------|-------------|------------|
| Caffeoyl                         |            |                         |            |            |                |            |             |            |
| C <sub>1</sub> /H <sub>1</sub>   | 127.6/-    | 127.66/-                | 127.6/-    | 127.7/-    | 127.5/-        | 127.8/-    | 127.64/-    | 127.8/-    |
| C <sub>2</sub> /H <sub>2</sub>   | 115.2/7.05 | 115.24/7.06             | 115.2/7.00 | 115.2/7.10 | 115.2/7.05     | 115.5/7.01 | 115.27/7.06 | 115.4/7.00 |
| C <sub>3</sub> /H <sub>3</sub>   | 147.2/-    | 146.85/-                | 146.9/-    | 146.9/-    | 146.9/-        | 146.9/-    | 146.83/-    | 146.9/-    |
| C <sub>4</sub> /H <sub>4</sub>   | 149.8/-    | 149.82/-                | 149.8/-    | 149.8/-    | 149.9/-        | 149.8/-    | 149.83/-    | 149.8/-    |
| C <sub>5</sub> /H <sub>5</sub>   | 116.5/6.79 | 116.54/6.80             | 116.5/6.73 | 116.2/6.80 | 116.5/6.82     | 116.5/6.73 | 116.49/6.78 | 116.6/6.73 |
| C <sub>6</sub> /H <sub>6</sub>   | 123.2/6.96 | 123.28/6.96             | 123.1/6.90 | 123.1/7.00 | 123.2/6.95     | 123.1/6.91 | 123.28/6.96 | 123.1/6.91 |
| C <sub>7</sub> /H <sub>7</sub>   | 114.6/6.27 | 148.08/7.60             | 147.8/7.54 | 147.6/7.64 | 148.1/7.59     | 147.8/6.25 | 148.26/7.61 | 147.8/7.56 |
| C <sub>8</sub> /H <sub>8</sub>   | 148.0/7.60 | 114.79/6.28             | 114.6/6.24 | 114.8/6.33 | 114.6/6.27     | 114.6/7.55 | 114.46/6.28 | 114.7/6.25 |
| C <sub>9</sub> /H <sub>9</sub>   | 168.2/-    | 168.30,168.29/-         | 168.3/-    | 168.3/-    | 168.2/-        | 168.2/-    | 167.97/-    | 168.1/-    |
| Glc                              |            |                         |            |            |                |            |             |            |
| C <sub>1'</sub> /H <sub>1'</sub> | 104.6/4.41 | 104.60,104.06/4.43,4.41 | 104.4/4.36 | 105.0/4.49 | 104.1/4.47     | 99.9/4.51  | 99.04/4.55  | 99.5/4.44  |
| C <sub>2'</sub> /H <sub>2'</sub> | 76.1/3.46  | 76.12,76.43/3.42        | 75.2/-     | 75.3/3.36  | 76.3/3.50-3.65 | 74.3/3.40  | 81.93/3.45  | 80.9/3.23  |
| C <sub>3'</sub> /H <sub>3'</sub> | 81.4/3.84  | 81.31,81.43/3.82        | 75.6/-     | 75.8/3.68  | 81.2/3.86      | 76.0/5.25  | 77.42/4.13  | 73.1/3.82  |
| C <sub>4'</sub> /H <sub>4'</sub> | 70.4/4.95  | 70.45/4.92              | 73.9/-     | 72.8/4.97  | 70.4/4.93      | 70.2/3.62  | 70.40/5.10  | 72.4/4.99  |

|                                                              |                |                                 |            |                |                |                |                 |                |
|--------------------------------------------------------------|----------------|---------------------------------|------------|----------------|----------------|----------------|-----------------|----------------|
| C <sub>5</sub> /H <sub>5</sub> <sup>i</sup>                  | 76.1/3.55      | 76.07,76.09/3.54                | 74.8/-     | 75/3.70        | 76.4/3.50-3.65 | 78.5/3.67      | 77.81/3.57,3.75 | 76.5/3.81      |
| C <sub>6</sub> /H <sub>6</sub> <sup>i</sup>                  | 62.3/3.63,3.53 | 62.32/3.52,3.61                 | 67.7/-     | 67.6/3.79,3.52 | 62.5/3.50-3.65 | 67.8/3.45,3.72 | 62.09/3.67      | 67.6/3.45,3.72 |
| Rhamnose                                                     |                |                                 |            |                |                |                |                 |                |
| C <sub>1</sub> <sup>ii</sup> /H <sub>1</sub> <sup>ii</sup>   | 102.9/5.20     | 102.94,103.00/5.22,5.20         | 102.3/4.58 | 102.2/4.67     | 103.0/5.22     | 102.3/4.73     | 102.19/5.17     | 102.4/4.57     |
| C <sub>2</sub> <sup>ii</sup> /H <sub>2</sub> <sup>ii</sup>   | 72.4/3.93      | 72.37/3.96                      | 72.2/-     | 72.0/3.88      | 72.1/3.93      | 72.0/3.85      | 72.08/3.77      | 72/3.80        |
| C <sub>3</sub> <sup>ii</sup> /H <sub>3</sub> <sup>ii</sup>   | 72.0/3.58      | 72.06/3.60                      | 72.4/-     | 72.3/3.78      | 72.1/3.50-3.65 | 72.4/3.70      | 71.94/3.52      | 72.5/3.60      |
| C <sub>4</sub> <sup>ii</sup> /H <sub>4</sub> <sup>ii</sup>   | 73.8/3.28      | 73.79/3.31                      | 73.5/-     | 73.9/3.41      | 73.8/3.27-3.34 | 74.0/3.37      | 73.57/3.27      | 74/3.28        |
| C <sub>5</sub> <sup>ii</sup> /H <sub>5</sub> <sup>ii</sup>   | 70.4/3.57      | 70.38/3.56                      | 69.9/-     | 69.9/3.65      | 70.4/3.50-3.65 | 69.9/3.71      | 70.16/-         | 69.9/3.51      |
| C <sub>6</sub> <sup>ii</sup> /H <sub>6</sub> <sup>ii</sup>   | 18.5/1.10      | 18.48/1.07                      | 18.0/1.14  | 18.0/1.24      | 18.4/1.09      | 18.0/1.26      | 18.32/1.11      | 17.9/1.14      |
| C <sub>1</sub> <sup>iii</sup> /H <sub>1</sub> <sup>iii</sup> | 133.6/-        | 133.60,133.87/-                 | 133.8/-    | 131.8/-        | 127.6/-        | 129.8/-        | 129.83/-        | 129.9/-        |
| C <sub>2</sub> <sup>iii</sup> /H <sub>2</sub> <sup>iii</sup> | 115.7/6.76     | 114.65,114.67/6.85              | 114.7/6.80 | 115.0/6.79     | 115.5/7.42     | 115.1/6.78     | 2 114.50/6.83   | 115.1/6.79     |
| C <sub>3</sub> <sup>iii</sup> /H <sub>3</sub> <sup>iii</sup> | 146.2/-        | 146.12,146.03/-                 | 146.1/-    | 146.5/-        | 152.7/-        | 146.3/-        | 146.37/-        | 146.3/-        |
| C <sub>4</sub> <sup>iii</sup> /H <sub>4</sub> <sup>iii</sup> | 146.0/-        | 146.31,146.26/-                 | 146.2/-    | 146.3/-        | 146.9/-        | 146.6/-        | 146.41/-        | 146.6/-        |
| C <sub>5</sub> <sup>iii</sup> /H <sub>5</sub> <sup>iii</sup> | 116.1/6.79     | 116.21,116.17/6.77              | 116.2/6.66 | 116.5/6.82     | 116.1/6.77     | 116.4/6.69     | 116.23/6.73     | 116.2/6.67     |
| C <sub>6</sub> <sup>iii</sup> /H <sub>6</sub> <sup>iii</sup> | 118.9/6.74     | 119.00,119.11/6.56              | 119.1/6.62 | 119.7/6.70     | 123.0/7.43     | 119.5/6.66     | 118.90/6.69     | 119.4/6.67     |
| C <sub>7</sub> <sup>iii</sup> /H <sub>7</sub> <sup>iii</sup> | 76.7/3.98      | 73.57,74.21/4.75                | 76.5/4.70  | 81.9/4.48      | 196.2/-        | 78.7/4.50      | 78.43/4.60      | 78.8/4.51      |
| C <sub>8</sub> <sup>iii</sup> /H <sub>8</sub> <sup>iii</sup> | 74.2/4.75      | 76.18,76.69/3.95,3.60;3.83,3.71 | 73.4/-     | 75.4/4.02,3.66 | 72.1/4.92,5.26 | 72.6/3.90,3.61 | 72.96/3.60,3.99 | 72.8/3.91,3.62 |

|                                |                                                            |                    |                    |                    |                    |                    |                    |                    |
|--------------------------------|------------------------------------------------------------|--------------------|--------------------|--------------------|--------------------|--------------------|--------------------|--------------------|
|                                | C <sub>9</sub> <sup>m</sup> /H <sub>9</sub> <sup>m</sup>   |                    | 69.6/3.42          |                    |                    |                    |                    |                    |
|                                | C <sub>10</sub> <sup>m</sup> /H <sub>10</sub> <sup>m</sup> |                    | 32.9/1.60          |                    |                    |                    |                    |                    |
|                                | C <sub>11</sub> <sup>m</sup> /H <sub>11</sub> <sup>m</sup> |                    | 20.4/1.40          |                    |                    |                    |                    |                    |
|                                | C <sub>12</sub> <sup>m</sup> /H <sub>12</sub> <sup>m</sup> |                    | 14.7/0.94          |                    |                    |                    |                    |                    |
| Determination<br><br>condition | 125MHz,                                                    | 100MHz,            | 125MHz,            | 125MHz,            | 125MHz,            | 100MHz,            | 125MHz,            | 125MHz,            |
|                                | CD <sub>3</sub> OD                                         | CD <sub>3</sub> OD | CD <sub>3</sub> OD | CD <sub>3</sub> OD | CD <sub>3</sub> OD | CD <sub>3</sub> OD | CD <sub>3</sub> OD | CD <sub>3</sub> OD |
|                                | /                                                          | /                  | /                  | /                  | /                  | /                  | /                  | /                  |
|                                | 500MHz,                                                    | 400MHz,            | 500MHz,            | 500MHz,            | 500MHz,            | 400MHz,            | 500MHz,            | 500MHz,            |
|                                | CD <sub>3</sub> OD                                         | CD <sub>3</sub> OD | CD <sub>3</sub> OD | CD <sub>3</sub> OD | CD <sub>3</sub> OD | CD <sub>3</sub> OD | CD <sub>3</sub> OD | CD <sub>3</sub> OD |
| Reference                      | [106]                                                      | [97]               | [107]              | [107]              | [108]              | [109]              | [110]              | [107]              |

---

**Table S17.** NMR Spectroscopic Data ( $\delta$ ) of Compounds 155~162

| No.                              | 155        | 156        | 157             | 158        | 159        | 160        | 161        | 162         |
|----------------------------------|------------|------------|-----------------|------------|------------|------------|------------|-------------|
| Caffeoyl                         |            |            |                 |            |            |            |            |             |
| C <sub>1</sub> /H <sub>1</sub>   | 127.6/-    | 127.6/-    | 127.1/-         | 127.6/-    | 128.0/-    | 127.6/-    | 127.6/-    | 127.39/-    |
| C <sub>2</sub> /H <sub>2</sub>   | 115.2/7.08 | 115.2/7.06 | 115.7/6.63-7.05 | 114.2/7.07 | 115.6/7.06 | 115.4/7.05 | 115.2/7.06 | 115.35/7.06 |
| C <sub>3</sub> /H <sub>3</sub>   | 146.9/-    | 146.8/-    | 144.9/-         | 147.0/-    | 147.1/-    | 146.8/-    | 146.8/-    | 146.42/-    |
| C <sub>4</sub> /H <sub>4</sub>   | 149.4/-    | 149.7/-    | 147.9/-         | 150.2/-    | 150.0/-    | 149.8/-    | 149.8/-    | 149.55/-    |
| C <sub>5</sub> /H <sub>5</sub>   | 116.3/6.81 | 116.3/6.79 | 114.2/6.63-7.05 | 114.6/6.80 | 116.9/6.78 | 116.6/6.78 | 116.5/6.78 | 116.69/6.78 |
| C <sub>6</sub> /H <sub>6</sub>   | 123.4/6.98 | 123.2/6.99 | 123.4/6.63-7.05 | 123.4/6.97 | 123.5/6.96 | 123.2/6.96 | 123.2/6.96 | 123.51/6.96 |
| C <sub>7</sub> /H <sub>7</sub>   | 114.6/6.26 | 168.3/-    | 117.2/6.29      | 117.1/6.25 | 148.3/7.59 | 148.1/7.60 | 114.7/6.28 | 114.35/6.27 |
| C <sub>8</sub> /H <sub>8</sub>   | 148.0/7.59 | 114.7/6.28 | 147.9/7.60      | 148.0/7.59 | 115.1/6.28 | 114.7/6.27 | 148.0/7.60 | 148.30/7.59 |
| C <sub>9</sub> /H <sub>9</sub>   | 168.2/-    | 148.0/7.59 | 168.4/-         | 127.6/-    | 168.4/-    | 167.9/-    | 168.1/-    | 168.54/-    |
| Glc                              |            |            |                 |            |            |            |            |             |
| C <sub>1</sub> /H <sub>1</sub> ' | 104.1/4.38 | 104.1/4.37 | 102.7/4.28      | 104.2/4.38 | 104.5/4.37 | 101.7/4.53 | 104.1/4.37 | 103.74/4.36 |
| C <sub>2</sub> /H <sub>2</sub> ' | 76.4/3.41  | 76.0/3.39  | 74.3/3.29-3.96  | 80.0/3.66  | 76.5/3.38  | 75.1/4.86  | 76.1/3.39  | 75.53/3.34  |
| C <sub>3</sub> /H <sub>3</sub> ' | 80.5/3.83  | 81.9/3.78  | 81.1/3.29-3.96  | 80.4/3.85  | 81.9/3.80  | 80.4/4.00  | 81.7/3.80  | 82.22/3.74  |
| C <sub>4</sub> /H <sub>4</sub> ' | 70.4/4.93  | 70.6/4.92  | 70.8/3.29-3.96  | 70.5/4.93  | 71.2/4.94  | 71.0/5.02  | 70.8/4.93  | 70.37/4.93  |

|                                    |                |                |                 |                |                |                |                |                 |
|------------------------------------|----------------|----------------|-----------------|----------------|----------------|----------------|----------------|-----------------|
| C <sub>5</sub> /H <sub>5</sub> '   | 75.9/3.55      | 75.9/3.53      | 72.7/3.29-3.96  | 76.4/3.51-3.62 | 74.9/3.69      | 74.7/3.74      | 74.6/3.71      | 73.90/3.71      |
| C <sub>6</sub> /H <sub>6</sub> '   | 62.3/3.65,3.55 | 62.3/3.54,3.63 | 67.3/3.29-3.96  | 62.4/3.51-3.62 | 68.8/3.74,3.49 | 68.2/3.74,3.50 | 68.4/3.72,3.48 | 68.11/3.47,3.70 |
| C <sub>7</sub> /H <sub>7</sub> '   |                |                |                 |                |                | 171.5/-        |                |                 |
| C <sub>8</sub> /H <sub>8</sub> '   |                |                |                 |                |                | 20.8/1.98      |                |                 |
| Rhamnose                           |                |                |                 |                |                |                |                |                 |
| C <sub>1</sub> "/H <sub>1</sub> "  | 102.1/5.28     | 101.9/5.36     | 102.0/5.05      | 102.1/5.28     | 103.3/5.18     | 103.2/4.79     | 102.9/5.17     | 101.92/5.34     |
| C <sub>2</sub> "/H <sub>2</sub> "  | 72.4/3.90-3.85 | 79.9/3.90      | 70.4/3.29-3.96  | 72.6/3.60,3.65 | 72.6/3.91      | 72.6/3.62      | 72.3/4.07      | 79.76/3.88      |
| C <sub>3</sub> "/H <sub>3</sub> "  | 72.3/3.67      | 71.6/3.66      | 69.8/3.29-3.96  | 72.5/3.29,3.90 | 72.4/3.58      | 71.9/3.50      | 71.9/3.73      | 71.17/3.62      |
| C <sub>4</sub> "/H <sub>4</sub> "  | 80.0/3.41      | 74.1/3.25      | 70.8/3.29-3.96  | 75.9/3.30      | 74.1/3.29      | 73.6/3.26      | 80.3/3.58      | 73.67/3.25      |
| C <sub>5</sub> "/H <sub>5</sub> "  | 68.8/3.55      | 70.3/3.54      | 69.7/3.29-3.96  | 76.4/3.60-3.95 | 70.7/3.57      | 70.7/3.50      | 70.4/3.54      | 70.37/3.43      |
| C <sub>6</sub> "/H <sub>6</sub> "  | 18.7/1.12      | 18.5/1.08      | 17.6/1.01       | 18.7/1.12      | 18.7/1.09      | 18.4/1.07      | 18.5/1.09      | 18.27/1.07      |
| C <sub>1</sub> "/H <sub>1</sub> "" | 131.4/-        | 131.5/-        | 131.8/-         | 131.5/6.69     | 131.8/-        | 131.8/-        | 131.4/-        | 131.45/-        |
| C <sub>2</sub> "/H <sub>2</sub> "" | 116.6/6.69     | 117.1/6.70     | 116.8/6.63-7.05 | 115.2/-        | 117.4/6.70     | 117.2/6.64     | 117.1/6.69     | 117.25/6.70     |
| C <sub>3</sub> "/H <sub>3</sub> "" | 146.0/-        | 146.0/-        | 144.3/-         | 146.2/-        | 146.4/-        | 146.0/-        | 146.1/-        | 145.64/-        |
| C <sub>4</sub> "/H <sub>4</sub> "" | 142.0/-        | 144.6/-        | 142.8/-         | 144.7/-        | 144.9/-        | 144.5/-        | 144.7/-        | 144.18/-        |
| C <sub>5</sub> "/H <sub>5</sub> "" | 117.1/6.68     | 116.5/6.68     | 116.7/6.63-7.05 | 116.4/6.68     | 116.7/6.68     | 116.3/6.67     | 116.3/6.67     | 116.56/6.68     |
| C <sub>6</sub> "/H <sub>6</sub> "" | 121.2/6.56     | 121.3/6.57     | 121.6/6.63-7.05 | 121.3/6.56     | 121.6/6.57     | 121.3/6.53     | 121.3/6.57     | 121.50/6.57     |



|                                                              |                    |                    |                  |                  |                    |                    |                    |                    |
|--------------------------------------------------------------|--------------------|--------------------|------------------|------------------|--------------------|--------------------|--------------------|--------------------|
| C <sub>7</sub> <sup>'''</sup> /H <sub>7</sub> <sup>'''</sup> | 72.3/4.05,3.70     | 72.2/3.71,4.04     | 71.6/-           | 72.3/3.71,4.08   | 72.6/4.00,3.72     | 71.8/4.04,3.64     | 72.4/4.00          | 72.32/3.75,3.96    |
| C <sub>8</sub> <sup>'''</sup> /H <sub>8</sub> <sup>'''</sup> | 36.5/2.79          | 36.5/2.80          | 35.0/2.73        | 36.6/2.79        | 36.9/2.79          | 36.3/2.70          | 36.6/2.79          | 36.12/2.79         |
| C <sub>1</sub> <sup>'''</sup> /H <sub>1</sub> <sup>'''</sup> | 111.4/5.22         | 112.1/5.11         | 109.4/5.80       | 111.4/5.21       | 111.4/4.90         | 111.0/4.90         | 111.0/4.90         | 111.80/5.09        |
|                                                              |                    |                    |                  |                  |                    |                    | 112.0/5.15         | 110.55/4.90        |
| C <sub>2</sub> <sup>'''</sup> /H <sub>2</sub> <sup>'''</sup> | 78.5/3.65          | 77.8/3.93          | 77.3/-           | 78.6/3.68        | 78.4/3.87          | 78.1/3.87          | 78.1/3.73          | 77.93/3.93         |
|                                                              |                    |                    |                  |                  |                    |                    | 78.1/3.96          | 77.83/3.86         |
| C <sub>3</sub> <sup>'''</sup> /H <sub>3</sub> <sup>'''</sup> | 79.9/3.65          | 80.5/3.73          | 79.9/-           | 80.2/-           | 80.9/-             | 80.6/-             | 80.6/-             | 80.56/-            |
|                                                              |                    |                    |                  |                  |                    |                    | 80.2/-             | 80.56/-            |
| C <sub>4</sub> <sup>'''</sup> /H <sub>4</sub> <sup>'''</sup> | 74.8/3.39          | 75.0/3.95          | 74.1/-           | 74.8/3.60-3.65   | 75.4/3.92,3.74     | 75.1/3.93,3.74     | 75.1/3.92,3.75     | 74.75/3.72         |
|                                                              |                    |                    |                  |                  |                    |                    | 74.9/4.05,3.92     | 74.75/3.72         |
| C <sub>5</sub> <sup>'''</sup> /H <sub>5</sub> <sup>'''</sup> | 65.7/3.27          | 65.6/3.57          | 64.3/-           | 65.8/3.31        | 66.0/3.54          | 65.7/3.55          | 65.6/3.54          | 65.13/3.57         |
|                                                              |                    |                    |                  |                  |                    |                    | 65.2/3.59          | 65.13/3.54         |
| Determination                                                | 75.5MHz,           | 125MHz,            | 100MHz,          | 100MHz,          | 125MHz,            | 125 MHz,           | 75 MHz,            | 75MHz              |
| condition                                                    | CD <sub>3</sub> OD | CD <sub>3</sub> OD | D <sub>2</sub> O | D <sub>2</sub> O | CD <sub>3</sub> OD | CD <sub>3</sub> OD | CD <sub>3</sub> OD | CD <sub>3</sub> OD |
|                                                              | /                  | /                  | /                | /                | /                  | /                  | /                  | /                  |
|                                                              | 300.13MHz,         | 500MHz,            | 400MHz,          | 400MHz,          | 500MHz,            | 500 MHz,           | 500 MHz,           | 300MHz             |
|                                                              | CD <sub>3</sub> OD | CD <sub>3</sub> OD | D <sub>2</sub> O | D <sub>2</sub> O | CD <sub>3</sub> OD | CD <sub>3</sub> OD | CD <sub>3</sub> OD | D <sub>2</sub> O   |
| Reference                                                    | [111]              | [112]              | [113]            | [114]            | [115]              | [115]              | [116]              | [117]              |

**Table S18.** NMR Spectroscopic Data ( $\delta$ ) of Compounds 163~173

| No.                              | 163        | 164        | 165        | 166        | 167           | 168        | 169         | 170         | 171        | 172         | 173        |
|----------------------------------|------------|------------|------------|------------|---------------|------------|-------------|-------------|------------|-------------|------------|
| Caffeoyl                         |            |            |            |            |               |            |             |             |            |             |            |
| C <sub>1</sub> /H <sub>1</sub>   | 127.6/-    | 125.5/-    | 126.4/-    | 127.8/-    | 127.6/-       | 125.5/-    | 125.52/-    | 125.51/-    | 125.5/-    | 127.44/-    | 127.7/-    |
| C <sub>2</sub> /H <sub>2</sub>   | 115.2/7.04 | 114.8/7.06 | 115.1/7.05 | 115.4/7.05 | 114.7/6.4-7.2 | 114.7/7.00 | 114.72/7.09 | 114.77/7.04 | 115.0/7.05 | 116.26/7.64 | 115.4/7.07 |
| C <sub>3</sub> /H <sub>3</sub>   | 146.9/-    | 145.6/-    | 146.1/-    | 146.9/-    | 149.5/-       | 145.5/-    | 145.48/-    | 145.54/-    | 145.7/-    | 148.14/-    | 146.8/-    |
| C <sub>4</sub> /H <sub>4</sub>   | 149.8/-    | 148.5/-    | 148.8/-    | 149.9/-    | 146.6/-       | 148.5/-    | 148.39/-    | 148.49/-    | 148.6/-    | 151.06/-    | 149.6/-    |
| C <sub>5</sub> /H <sub>5</sub>   | 116.5/6.77 | 115.8/6.76 | 116.2/6.77 | 116.6/6.78 | 116.5/6.4-7.2 | 115.8/6.75 | 113.41/6.82 | 113.43/6.76 | 115.9/6.75 | 117.18/7.20 | 116.5/6.78 |
| C <sub>6</sub> /H <sub>6</sub>   | 123.1/6.95 | 121.3/7.01 | 122.2/7.01 | 123.3/6.96 | 123.1/6.4-7.2 | 121.4/6.98 | 121.32/7.00 | 121.41/6.98 | 121.5/6.96 | 122.80/7.20 | 123.1/6.98 |
| C <sub>7</sub> /H <sub>7</sub>   | 147.8/7.58 | 145.1/7.49 | 114.1/6.26 | 114.9/6.27 | 168.3/-       | 145.6/7.46 | 145.59/7.52 | 146.76/7.47 | 145.1/7.45 | 147.22/8.03 | 147.2/7.56 |
| C <sub>8</sub> /H <sub>8</sub>   | 115.2/6.29 | 114.2/6.27 | 146.0/7.50 | 148.3/7.60 | 115.4/6.26    | 113.6/6.20 | 115.73/6.24 | 115.78/6.20 | 113.9/6.19 | 115.22/6.73 | 115.3/6.34 |
| C <sub>9</sub> /H <sub>9</sub>   | 168.6/-    | 165.7/-    | 166.7/-    | 168.6/-    | 148.1/7.60    | 165.7/-    | 165.51/-    | 165.90/-    | 166.7/-    | 167.47/-    | 168.3/-    |
| Glc                              |            |            |            | 104.3/4.39 | 104.1/4.28    | 101.3/4.57 |             |             |            |             | 103.5/4.49 |
| C <sub>1'</sub> /H <sub>1'</sub> | 104.4/4.35 | 100.1/4.74 | 102.7/4.39 | 104.8/4.30 | 104.5/4.38    | 101.8/4.54 | 102.37/4.41 | 102.24/4.35 | 102.7/4.28 | 104.76/4.81 | 104.3/4.63 |
| C <sub>2'</sub> /H <sub>2'</sub> |            |            |            | 76.3/3.39  | 75.9/-        | 81.1/3.56  |             |             |            |             | 82.6/3.67  |
|                                  |            |            |            | 75.2/3.20  | 74.9/-        | 74.3/2.99  |             |             |            |             | 75.4/3.09  |
| C <sub>3'</sub> /H <sub>3'</sub> | 75.8/3.60  | 74.1/3.42  | 73.5/3.66  | 81.7/3.81  | 81.5/-        | 77.7/3.86  | 78.88/3.77  | 78.95/3.72  | 81.1/3.40  | 80.84/4.47  | 81.3/4.09  |

|                                                          |                |                |                |                |            |                |             |                 |                |                 |                |
|----------------------------------------------------------|----------------|----------------|----------------|----------------|------------|----------------|-------------|-----------------|----------------|-----------------|----------------|
|                                                          |                |                |                | 77.9/3.34      | 77.6/-     | 77.1/3.12      |             |                 |                |                 | 78.1/3.28      |
|                                                          |                |                |                | 70.7/5.00      | 70.3/-     | 69.2/4.77      |             |                 |                |                 | 70.3/4.98      |
| C <sub>4</sub> /H <sub>4</sub> <sup>r</sup>              | 72.4/4.89      | 70.0/3.22      | 69.2/4.71      |                |            |                | 68.99/4.81  | 69.19/4.74      | 68.6/3.22      | 70.62/5.69      |                |
|                                                          |                |                |                | 71.6/3.28      | 71.4/-     | 69.7/3.11      |             |                 |                |                 | 72.3/3.01      |
|                                                          |                |                |                | 74.9/3.77      | 74.6/-     | 74.3/3.50      |             |                 |                |                 | 74.3/3.67      |
| C <sub>5</sub> /H <sub>5</sub> <sup>r</sup>              | 74.9/3.71      | 75.7/3.39      | 76.6/3.08      |                |            |                | 72.91/3.69  | 73.12/3.70      | 74.3/3.47      | 76.81/3.97      |                |
|                                                          |                |                |                | 78.0/3.23      | 77.6/-     | 77.1/3.16      |             |                 |                |                 | 78.1/3.21      |
|                                                          |                |                |                | 69.5/3.94,3.64 | 69.3/-     | 60.8/3.38,3.34 | 65.94/3.58- | 67.95/3.65-     |                |                 | 67.5/3.49,3.76 |
| C <sub>6</sub> /H <sub>6</sub> <sup>r</sup>              | 69.4/3.85,3.61 | 65.7/3.96,3.58 | 66.0/2.98,3.66 |                |            |                |             |                 | 63.5/4.19,4.36 | 62.55/4.11,4.20 |                |
|                                                          |                |                |                | 62.8/3.83,3.64 | 62.6/-     | 61.0/3.68,3.52 | 3.39        | 3.45            |                |                 | 63.2/3.43,3.77 |
| Xyl                                                      |                |                |                |                |            |                |             |                 |                |                 |                |
| C <sub>1</sub> <sup>r</sup> /H <sub>1</sub> <sup>r</sup> | 105.3/4.24     | 104.0/4.20     | 104.2/4.15     |                |            |                |             | 103.82/4.12     | 105.9/4.26     | 108.01/5.18     | 104.9/4.53     |
| C <sub>2</sub> <sup>r</sup> /H <sub>2</sub> <sup>r</sup> | 74.9/3.15      | 73.3/2.98      | 73.6/2.96      |                |            |                |             | 73.22/2.97      | 71.3/3.37      | 73.76/4.51      | 73.2/3.56      |
| C <sub>3</sub> <sup>r</sup> /H <sub>3</sub> <sup>r</sup> | 77.6/3.30      | 76.6/3.09      | 76.7/3.68      |                |            |                |             | 76.31/3.08      | 72.7/3.33      | 75.23/4.10      | 74.1/3.47      |
| C <sub>4</sub> <sup>r</sup> /H <sub>4</sub> <sup>r</sup> | 71.1/3.45      | 69.6/3.28      | 69.7/3.25      |                |            |                |             | 69.48/3.23      | 67.8/3.59      | 70.17/4.23      | 69.8/3.73      |
| C <sub>5</sub> <sup>r</sup> /H <sub>5</sub> <sup>r</sup> | 66.9/3.14,3.82 | 68.2/3.70,3.02 | 68.3/3.45,3.66 |                |            |                |             | 65.62/2.98,3.64 | 65.8/3.36,3.65 | 67.84/3.72,4.25 | 67.4/3.16,3.77 |
| Rhamnose                                                 |                |                |                |                |            |                | 101.14/5.10 |                 |                |                 |                |
|                                                          |                |                |                | 103.1/5.18     | 102.8/5.16 | 101.3/5.03     |             | 101.19/5.04     | 99.4/5.27      | 102.14/6.41     | 102.3/4.62     |
| C <sub>1</sub> <sup>r</sup> /H <sub>1</sub> <sup>r</sup> |                |                |                |                |            |                | 100.48/4.55 |                 |                |                 |                |
|                                                          |                |                |                |                |            |                | 70.42/3.75  |                 |                |                 |                |
| C <sub>2</sub> <sup>r</sup> /H <sub>2</sub> <sup>r</sup> |                |                |                | 72.5/3.91      | 72.1/-     | 70.4/3.81      |             | 70.50/3.70      | 81.0/3.77      | 82.47/4.77      | 72.0/3.83      |
|                                                          |                |                |                |                |            |                | 70.61/3.66  |                 |                |                 |                |

|                                      |                |                |                 |                |               |                |                 |                 |                |                 |               |
|--------------------------------------|----------------|----------------|-----------------|----------------|---------------|----------------|-----------------|-----------------|----------------|-----------------|---------------|
| C <sub>3'''</sub> /H <sub>3'''</sub> |                |                |                 |                |               | 70.25/3.35     |                 |                 |                |                 |               |
|                                      | 72.2/3.57      |                |                 |                |               | 72.1/-         | 70.4/3.27       | 70.21/3.29      | 70.6/3.56      | 73.27/4.49      | 72.0/3.66     |
| C <sub>4'''</sub> /H <sub>4'''</sub> |                |                |                 |                |               | 71.71/3.17     |                 |                 |                |                 |               |
|                                      | 73.9/3.28      |                |                 |                |               | 73.7/-         | 71.8/3.11       | 71.76/3.12      | 72.8/3.16      | 74.87/4.13      | 73.9/3.34     |
| C <sub>5'''</sub> /H <sub>5'''</sub> |                |                |                 |                |               | 68.65/3.42     |                 |                 |                |                 |               |
|                                      | 70.5/3.55      |                |                 |                |               | 70.6/-         | 68.9/3.34       | 68.74/3.36      | 68.0/3.90      | 70.49/4.40      | 69.9/3.6      |
| C <sub>6'''</sub> /H <sub>6'''</sub> |                |                |                 |                |               | 18.07/1.02     |                 |                 |                |                 |               |
|                                      | 18.5/1.08      |                |                 |                |               | 18.4/1.08      | 18.2/0.96       | 18.10/0.96      | 17.9/1.10      | 19.45/1.58      | 18.0/1.19     |
| C <sub>1'''</sub> /H <sub>1'''</sub> | 131.4/-        | 129.2/-        | 129.9/-         | 131.6/-        | 131.5/-       | 129.1/-        | 129.99/-        | 129.28/-        | 129.3/-        | 130.86/-        | 131.8/-       |
| C <sub>2'''</sub> /H <sub>2'''</sub> | 117.1/6.70     | 115.4/6.55     | 116.3/6.64      | 117.3/6.71     | 113.9/6.4-7.2 | 116.3/6.62     | 116.27/6.69     | 116.34/6.64     | 116.4/6.60     | 117.96/7.22     | 117.5/6.73    |
| C <sub>3'''</sub> /H <sub>3'''</sub> | 146.1/-        | 144.9/-        | 144.0/-         | 146.2/-        | 148.7/-       | 145.0/-        | 144.88/-        | 144.91/-        | 145.4/-        | 147.65/-        | 146.1/-       |
| C <sub>4'''</sub> /H <sub>4'''</sub> | 144.7/-        | 143.5/-        | 146.0/-         | 144.8/-        | 145.7/-       | 143.5/-        | 143.45/-        | 143.47/-        | 143.6/-        | 146.15/-        | 144.8/-       |
| C <sub>5'''</sub> /H <sub>5'''</sub> | 116.3/6.66     | 116.2/6.54     | 116.8/6.58      | 116.4/6.68     | 116.1/6.4-7.2 | 115.5/6.62     | 115.47/6.54     | 115.49/6.63     | 115.6/6.58     | 117.01/7.18     | 116.3/6.68    |
| C <sub>6'''</sub> /H <sub>6'''</sub> | 121.3/6.56     | 119.6/6.41     | 119.4/6.51      | 121.4/6.58     | 122.4/6.4-7.2 | 119.6/6.49     | 119.48/6.68     | 119.79/6.49     | 119.6/6.45     | 120.94/6.75     | 121.5/6.57    |
| C <sub>7'''</sub> /H <sub>7'''</sub> | 36.6/2.79      | 35.0/2.56      | 70.83/3.61,3.87 | 36.7/2.80      | 72.1/-        | 35.0/2.68      | 35.05/2.75      | 35.01/2.69      | 35.2/2.60      | 36.62/2.98      | 36.8/-        |
| C <sub>8'''</sub> /H <sub>8'''</sub> | 72.4/4.03,3.71 | 69.8/3.78,3.53 | 35.66/2.69      | 72.5/4.04,3.74 | 36.6/2.84     | 70.3/3.88,3.62 | 70.25/3.70,3.89 | 70.47/3.63-3.88 | 70.4/3.58,3.78 | 71.81/3.91,4.30 | 72.3/3.7,4.01 |

|               |                                                      |                                                         |                                                         |                                                              |                                                                  |                                                        |                                                                                                             |                                                                                                             |                                                         |                                                     |                                                      |
|---------------|------------------------------------------------------|---------------------------------------------------------|---------------------------------------------------------|--------------------------------------------------------------|------------------------------------------------------------------|--------------------------------------------------------|-------------------------------------------------------------------------------------------------------------|-------------------------------------------------------------------------------------------------------------|---------------------------------------------------------|-----------------------------------------------------|------------------------------------------------------|
|               |                                                      |                                                         |                                                         | C <sub>9</sub> <sup>mim</sup> /H <sub>9</sub> <sup>mim</sup> | 56.6/3.84                                                        |                                                        |                                                                                                             |                                                                                                             |                                                         |                                                     |                                                      |
|               |                                                      |                                                         |                                                         |                                                              | 109.2/4.80                                                       |                                                        |                                                                                                             |                                                                                                             |                                                         |                                                     |                                                      |
|               |                                                      |                                                         |                                                         | C <sub>1</sub> <sup>mim</sup> /H <sub>1</sub> <sup>mim</sup> | 109.9/5.19                                                       |                                                        |                                                                                                             |                                                                                                             |                                                         |                                                     |                                                      |
|               |                                                      |                                                         |                                                         |                                                              | 73.6/2.96                                                        |                                                        |                                                                                                             |                                                                                                             |                                                         |                                                     |                                                      |
|               |                                                      |                                                         |                                                         | C <sub>2</sub> <sup>mim</sup> /H <sub>2</sub> <sup>mim</sup> | 74.4/3.24                                                        |                                                        |                                                                                                             |                                                                                                             |                                                         |                                                     |                                                      |
|               |                                                      |                                                         |                                                         |                                                              | 79.2/-                                                           |                                                        |                                                                                                             |                                                                                                             |                                                         |                                                     |                                                      |
|               |                                                      |                                                         |                                                         | C <sub>3</sub> <sup>mim</sup> /H <sub>3</sub> <sup>mim</sup> | 79.1/-                                                           |                                                        |                                                                                                             |                                                                                                             |                                                         |                                                     |                                                      |
|               |                                                      |                                                         |                                                         |                                                              | 73.8/3.56,3.78                                                   |                                                        |                                                                                                             |                                                                                                             |                                                         |                                                     |                                                      |
|               |                                                      |                                                         |                                                         | C <sub>4</sub> <sup>mim</sup> /H <sub>4</sub> <sup>mim</sup> | 74.0/3.56,3.78                                                   |                                                        |                                                                                                             |                                                                                                             |                                                         |                                                     |                                                      |
|               |                                                      |                                                         |                                                         |                                                              | 63.9/3.35                                                        |                                                        |                                                                                                             |                                                                                                             |                                                         |                                                     |                                                      |
|               |                                                      |                                                         |                                                         | C <sub>5</sub> <sup>mim</sup> /H <sub>5</sub> <sup>mim</sup> | 63.9/3.35                                                        |                                                        |                                                                                                             |                                                                                                             |                                                         |                                                     |                                                      |
|               |                                                      |                                                         |                                                         |                                                              |                                                                  |                                                        | 90.53 MHz                                                                                                   | 90.53 MHz                                                                                                   |                                                         |                                                     |                                                      |
| Determination | 100MHz,                                              | 100MHz,                                                 | 100MHz,                                                 | MeOH-d <sub>4</sub> /                                        | 22.5MHz                                                          | 100MHz                                                 | DMSO-d <sub>6</sub>                                                                                         | DMSO-d <sub>6</sub>                                                                                         | 150MHz,                                                 | 150.35MHz                                           | 125MHz,                                              |
| condition     | CD <sub>3</sub> OD/<br>400MHz,<br>CD <sub>3</sub> OD | DMSO-d <sub>6</sub> /<br>400MHz,<br>DMSO-d <sub>6</sub> | DMSO-d <sub>6</sub> /<br>500MHz,<br>DMSO-d <sub>6</sub> | 400MHz<br>MeOH-d <sub>4</sub>                                | Methanol-d <sub>4</sub> /<br>89.55MHz<br>Methanol-d <sub>4</sub> | DMSO-d <sub>6</sub> /<br>400MHz<br>DMSO-d <sub>6</sub> | +CF <sub>3</sub> CO <sub>2</sub> H/<br>360 MHz<br>DMSO-d <sub>6</sub><br>+CF <sub>3</sub> CO <sub>2</sub> H | +CF <sub>3</sub> CO <sub>2</sub> H/<br>360 MHz<br>DMSO-d <sub>6</sub><br>+CF <sub>3</sub> CO <sub>2</sub> H | DMSO-d <sub>6</sub> /<br>600MHz,<br>DMSO-d <sub>6</sub> | Py-d <sub>5</sub> /<br>600MHz Py-<br>d <sub>5</sub> | CD <sub>3</sub> OD/<br>500MHz,<br>CD <sub>3</sub> OD |
| Reference     | [118]                                                | [101]                                                   | [119]                                                   | [120]                                                        | [121]                                                            | [122]                                                  | [123]                                                                                                       | [124]                                                                                                       | [125]                                                   | [126]                                               | [127]                                                |
